# Supplementary material for: Exploring coverage-dependent chain-growth mechanisms on Ru(111) for Fischer–Tropsch synthesis
Source: Royal Society of Chemistry journal article supplement (doi:10.1039/d2cy01279k), 2022-11-21
Supplement: d2cy01279k1.pdf [file d2cy01279k1.pdf]

**Electronic Supporting Information**

**Exploring Coverage-Dependent Chain-Growth Mechanisms on Ru(111) for Fischer-Tropsch Synthesis**

Yueyue Jiao<sup>a,b,c</sup>, Huan Ma<sup>a,b,c</sup>, Pengju Ren<sup>a,c</sup>, Teng Li<sup>d</sup>, Yong-Wang Li<sup>a,b,c</sup>, Xiao-Dong Wen<sup>\*a,b,c,e</sup>, and Haijun Jiao<sup>\*f</sup>

(a) State Key Laboratory of Coal Conversion, Institute of Coal Chemistry, Chinese Academy of Sciences, Taiyuan 030001, China. (b) The University of Chinese Academy of Sciences, Beijing 100049, China. (c) National Energy Center for Coal to Liquids, Synfuels China Co., Ltd., Beijing 101400, China. (d) State Key Laboratory for Oxo Synthesis and Selective Oxidation, Lanzhou Institute of Chemical Physics, Chinese Academy of Sciences, No.18, Tianshui Middle Road, Lanzhou, 730000, China. (e) Beijing Advanced Innovation Center for Materials Genome Engineering, Industry-University Cooperation Base between Beijing Information S&T University and Synfuels China Co. Ltd, Beijing, China. (f) Leibniz-Institut für Katalyse e.V.; Albert-Einstein Strasse 29a, 18059 Rostock, Germany; E-mails: [wxd@sxicc.ac.cn](mailto:wxd@sxicc.ac.cn); and [Haijun.jiao@catalysis.de](mailto:Haijun.jiao@catalysis.de)

As shown in Figure S1, there are merely consistent CO adsorption patterns on the Ru(0001) and Ru(111) surfaces. On Ru(111) (Figure S2), the first region shows a stable 1 ML CO coverage (9CO) from 0 to 225 K, where all adsorbed CO molecules are at the hcp sites (Figure S2). Very similar regions are found on Ru(0001). However, the 1 ML CO region is not found previously because of different model,<sup>1</sup> and the main difference comes from the adsorption sites (hcp vs. top). As shown in Table S1, the adsorption of all CO molecules at the hcp sites is 1.08 and 0.53 eV more stable than that at the top sites on the Ru(111) and Ru(0001) surfaces, respectively. Disordered CO adsorption on Ru(0001) was observed below 77 K by scanning tunneling microscopy (STM) in an ultrahigh vacuum (UHV) chamber with a base pressure of  $7 \times 10^{-11}$  mbar,<sup>2</sup> however, it does not give clear evidence about the CO coverage. Under UHV ( $5 \times 10^{-11}$  mbar pressure), temperature programmed desorption (TPD) shows CO coverage of 0.54 ML at 370 K, 0.43 ML at 413 K and 0.22 ML at 490 K,<sup>3</sup> which is consistent with the computed results (dashed line, Figure S1b).

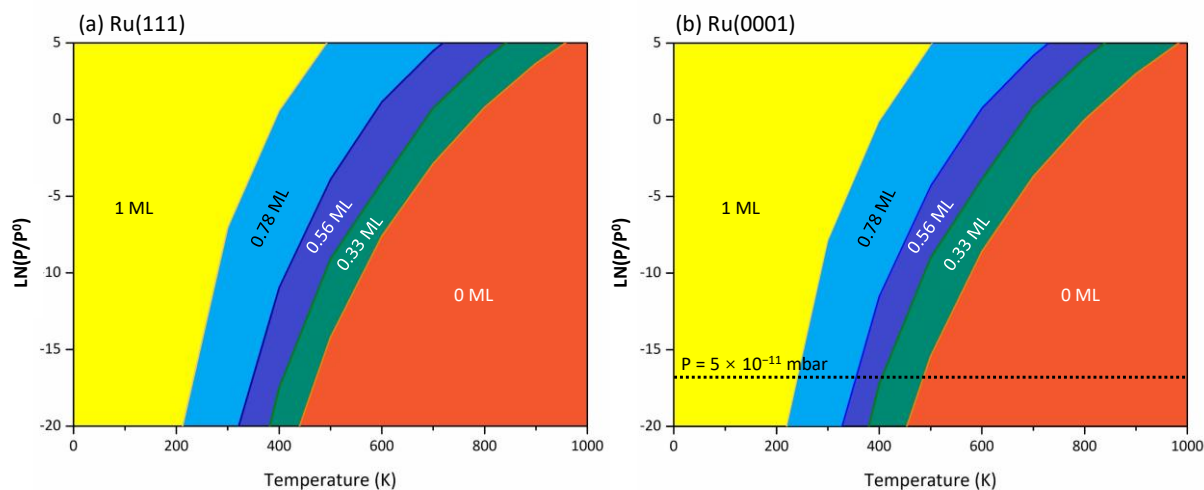

**Figure S1.** Phase diagrams of stable CO coverage as a function of temperature and CO partial pressure ( $\ln(P/P^0)$ ). (a) Ru(111) surface (b) Ru(0001) surface (dash line for CO pressure of  $5 \times 10^{-11}$  mbar).

**Table S1.** DFT energies (E, eV) and zero-point energies (ZPE, eV) of 9 CO adsorbed at different sites on Ru(111) and Ru(0001).

| site   | Ru(111) |      |         |                 | Ru(0001) |      |         |                 |
|--------|---------|------|---------|-----------------|----------|------|---------|-----------------|
|        | E       | ZPE  | E+ZPE   | $\Delta(E+ZPE)$ | E        | ZPE  | E+ZPE   | $\Delta(E+ZPE)$ |
| hcp    | -434.30 | 1.95 | -432.35 | 0.00            | -436.94  | 1.92 | -435.01 | 0.00            |
| fcc    | -433.78 | 1.92 | -431.83 | 0.52            | -436.73  | 1.99 | -434.74 | 0.27            |
| top    | -433.35 | 2.10 | -431.23 | 1.08            | -436.67  | 2.12 | -434.48 | 0.53            |
| bridge | -433.75 | 2.04 | -431.75 | 0.60            | -436.60  | 2.00 | -434.12 | 0.83            |

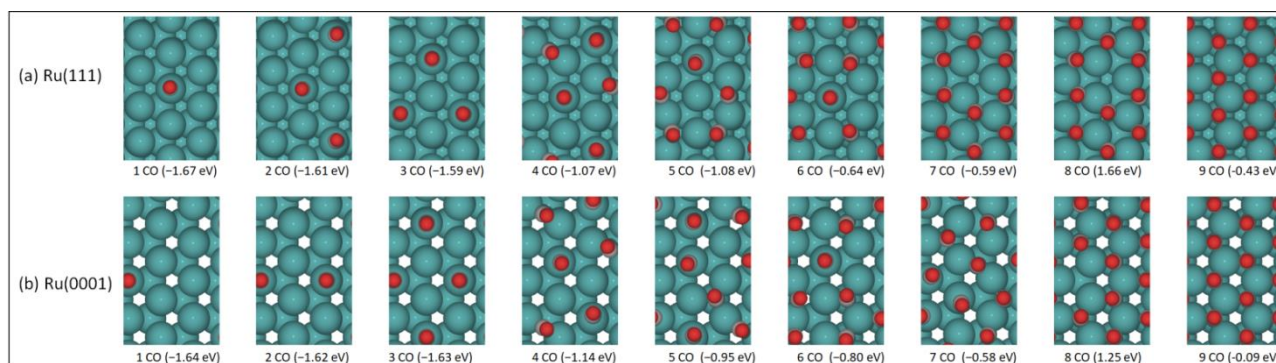

**Figure S2.** Stepwise adsorption energy (the values in the brackets) of CO. (a) Ru(111). (b) Ru(0001)

**Table S2.** Gibbs free energies ( $\Delta G$ , eV) of the 1 H adsorption on the highest CO pre-covered Ru(111) surface and on the highest CO pre-covered Ru(111) surface with one CO desorption (423 K, 30 atm, and  $p_{\text{H}_2}/p_{\text{CO}} = 2/1$ )

| Reactions                                                                            | $\Delta G$ |
|--------------------------------------------------------------------------------------|------------|
| $7\text{CO} + 0.5\text{H}_2(\text{g}) = 7\text{CO} + \text{H}$                       | 0.64       |
| $7\text{CO} + 0.5\text{H}_2(\text{g}) = 6\text{CO} + \text{H} + \text{CO}(\text{g})$ | 0.50       |

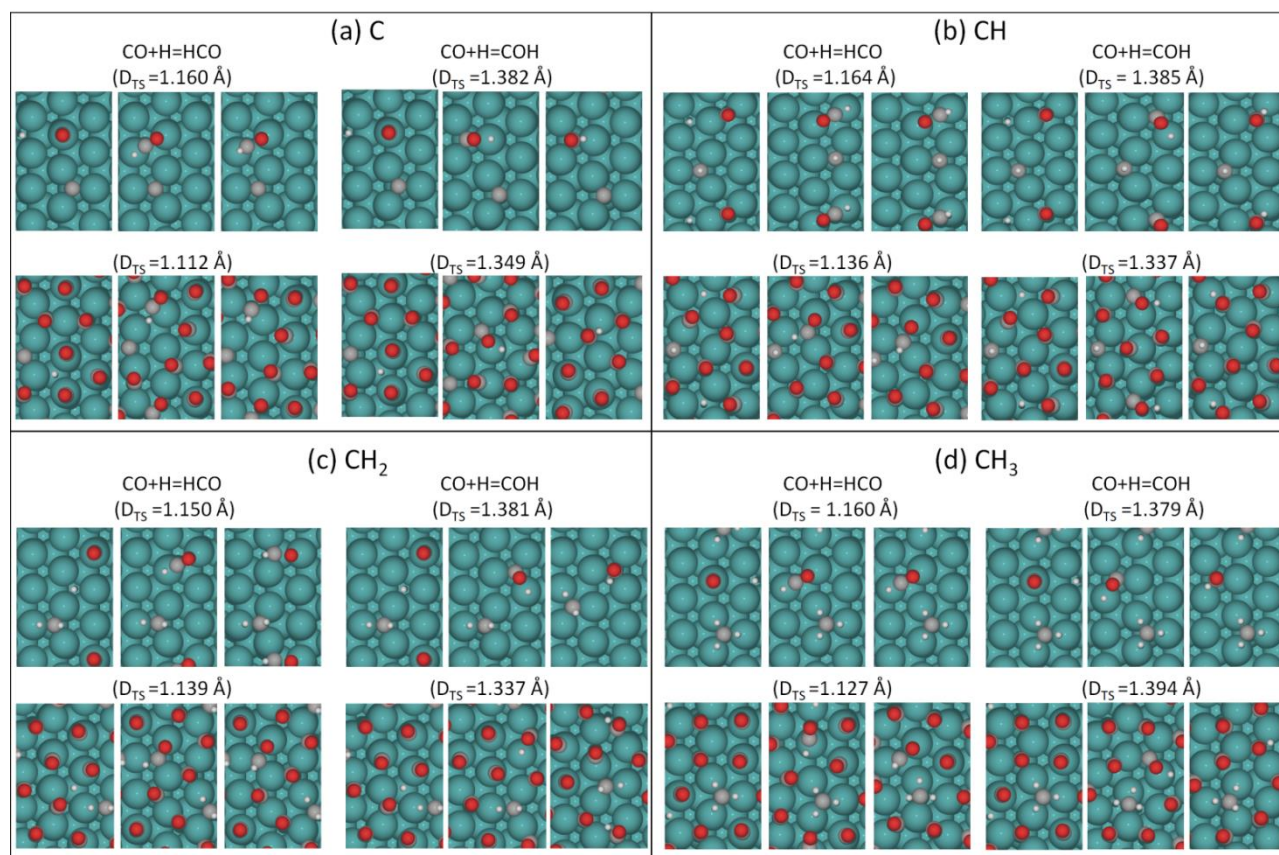

**Figure S3.** Surface structures of the initial (IS), transition (TS) and final (FS) states for the formation of HCO and COH on pre-adsorbed  $\text{CH}_x$  ( $x=0-3$ ) with the forming C-H bond length ( $D_{\text{TS}}$ ) in the transition state (top structures are those at the lowest coverage, and bottom structures are those at CO pre-saturation coverage)

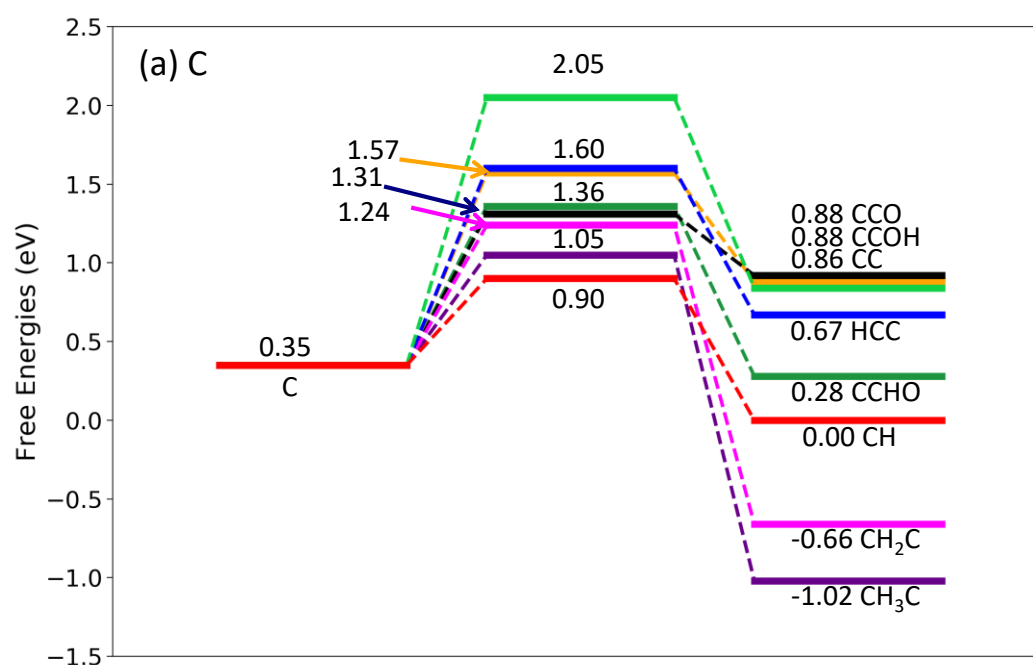

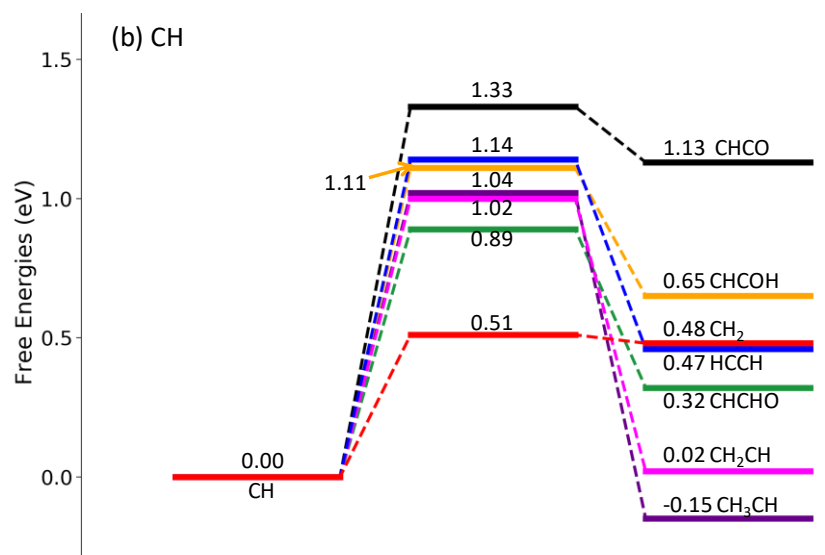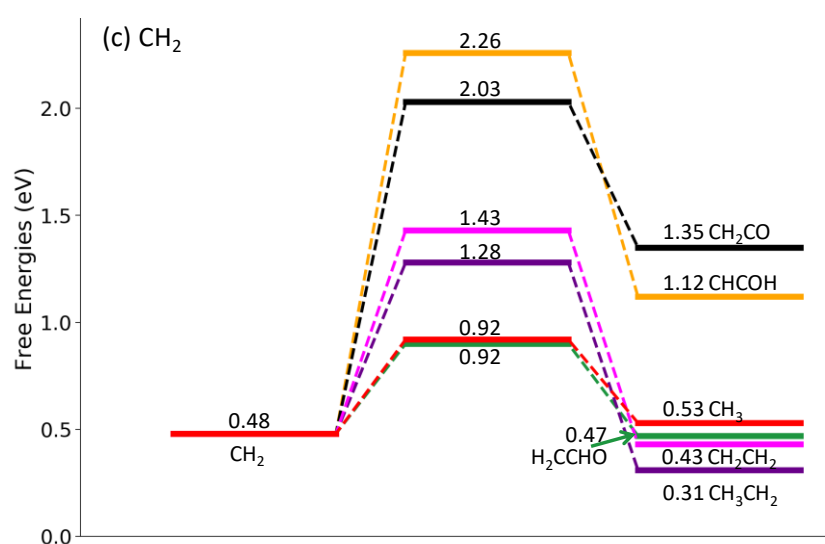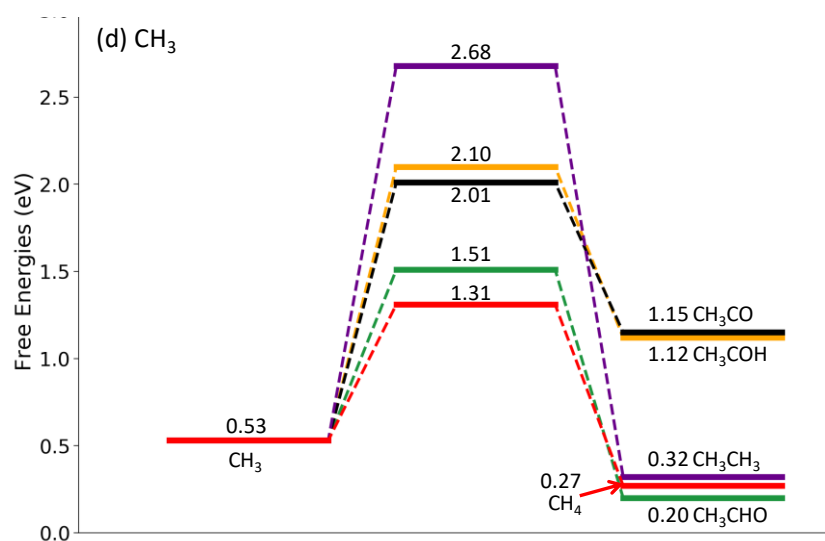

**Figure S4.** Gibbs free energy barriers and reaction energies (eV) for the competitive CH<sub>x</sub> hydrogenation and CH<sub>x</sub>-C1 coupling at the lowest coverage.

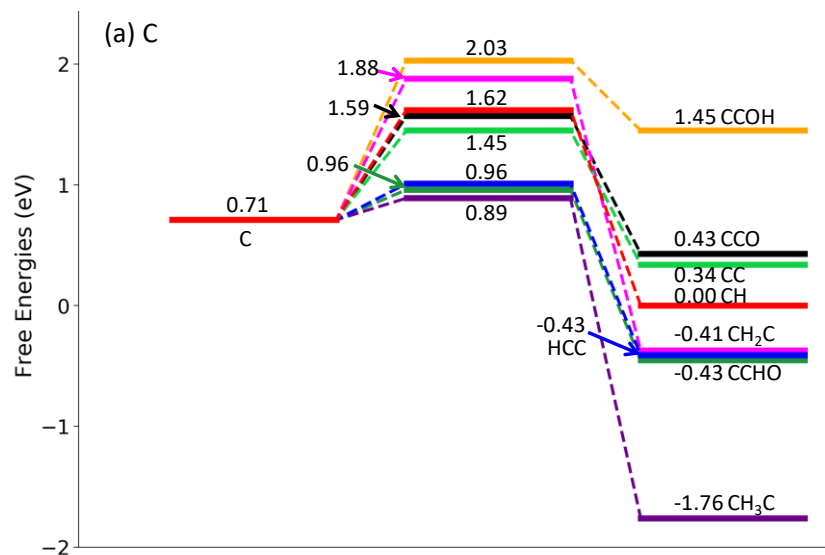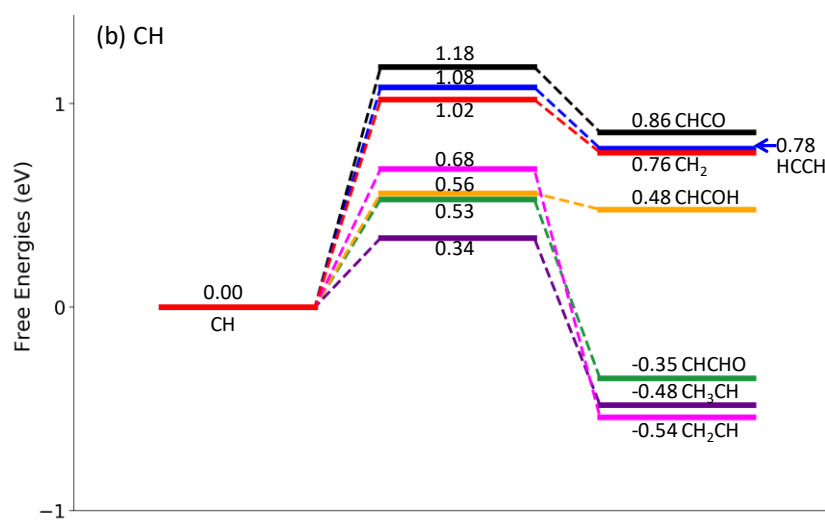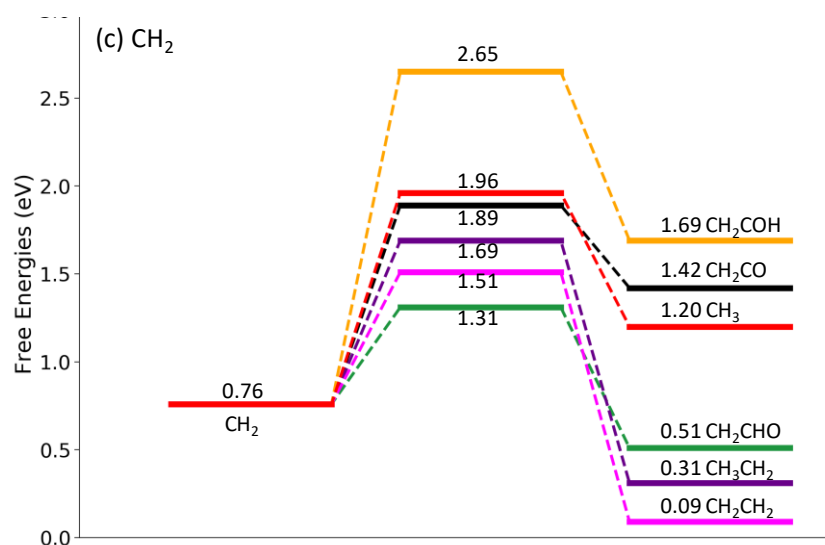

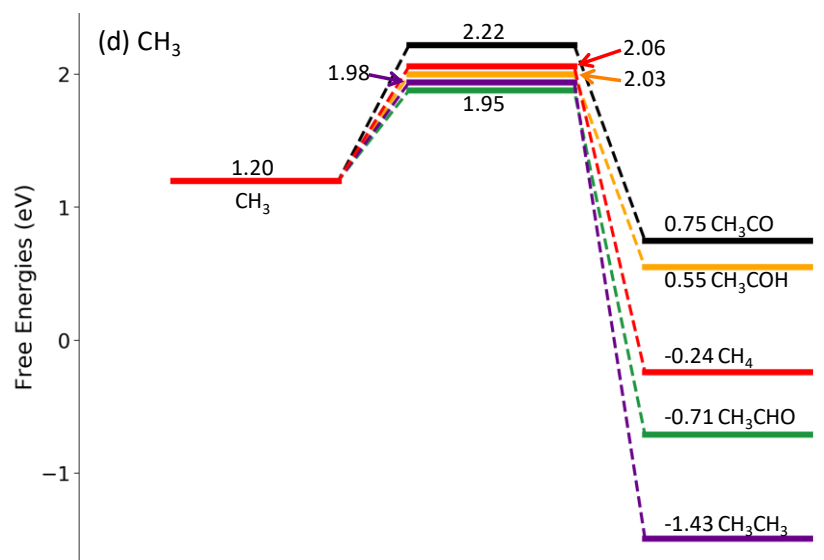

**Figure S5.** Gibbs free energy barriers and reaction energies (eV) for the competitive  $\text{CH}_x$  hydrogenation and  $\text{CH}_x\text{-C1}$  coupling at CO pre-saturation coverage

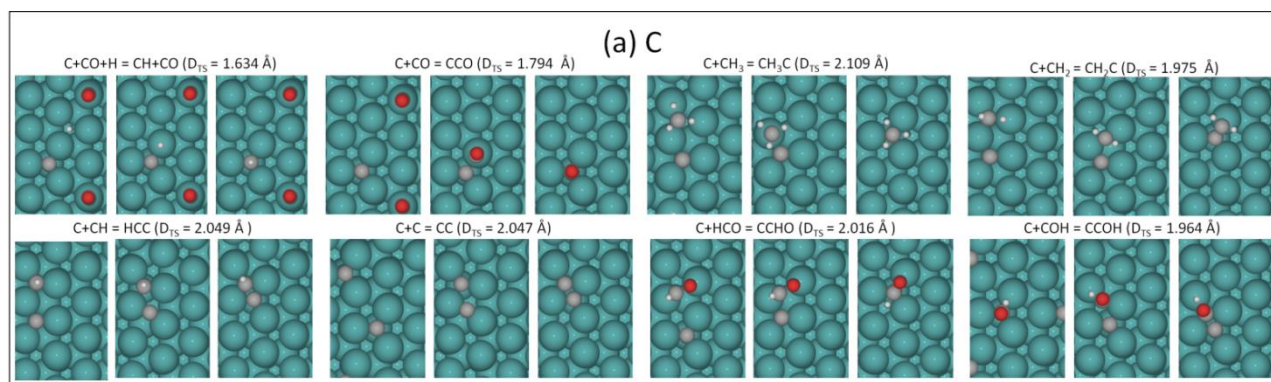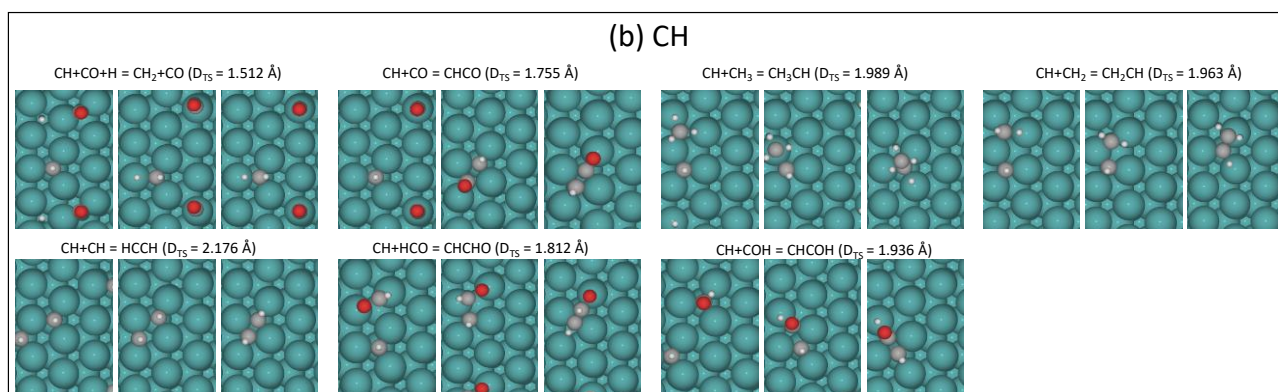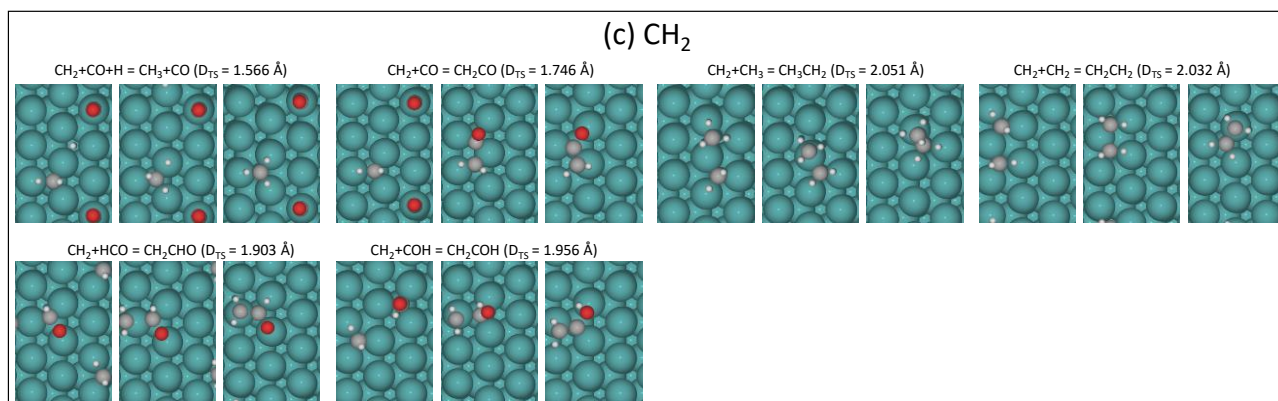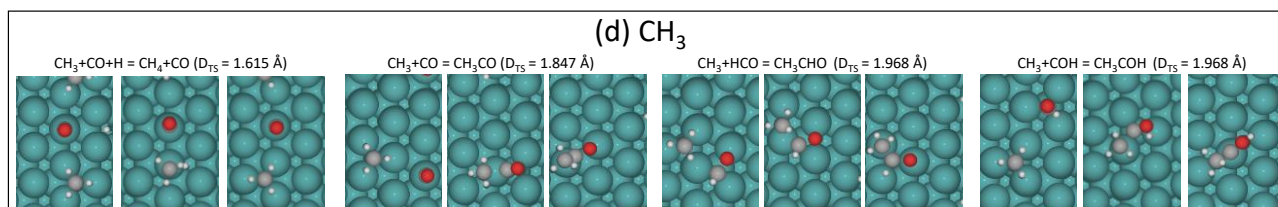

**Figure S6.** Surface structures of the initial (IS), transition (TS) and final (FS) states for the competitive  $CH_x$  hydrogenation and  $CH_x$ -C1 coupling at the lowest coverage. Elementary reactions along with the forming C-H or C-C bond length ( $D_{TS}$ ) in the transition states are given.

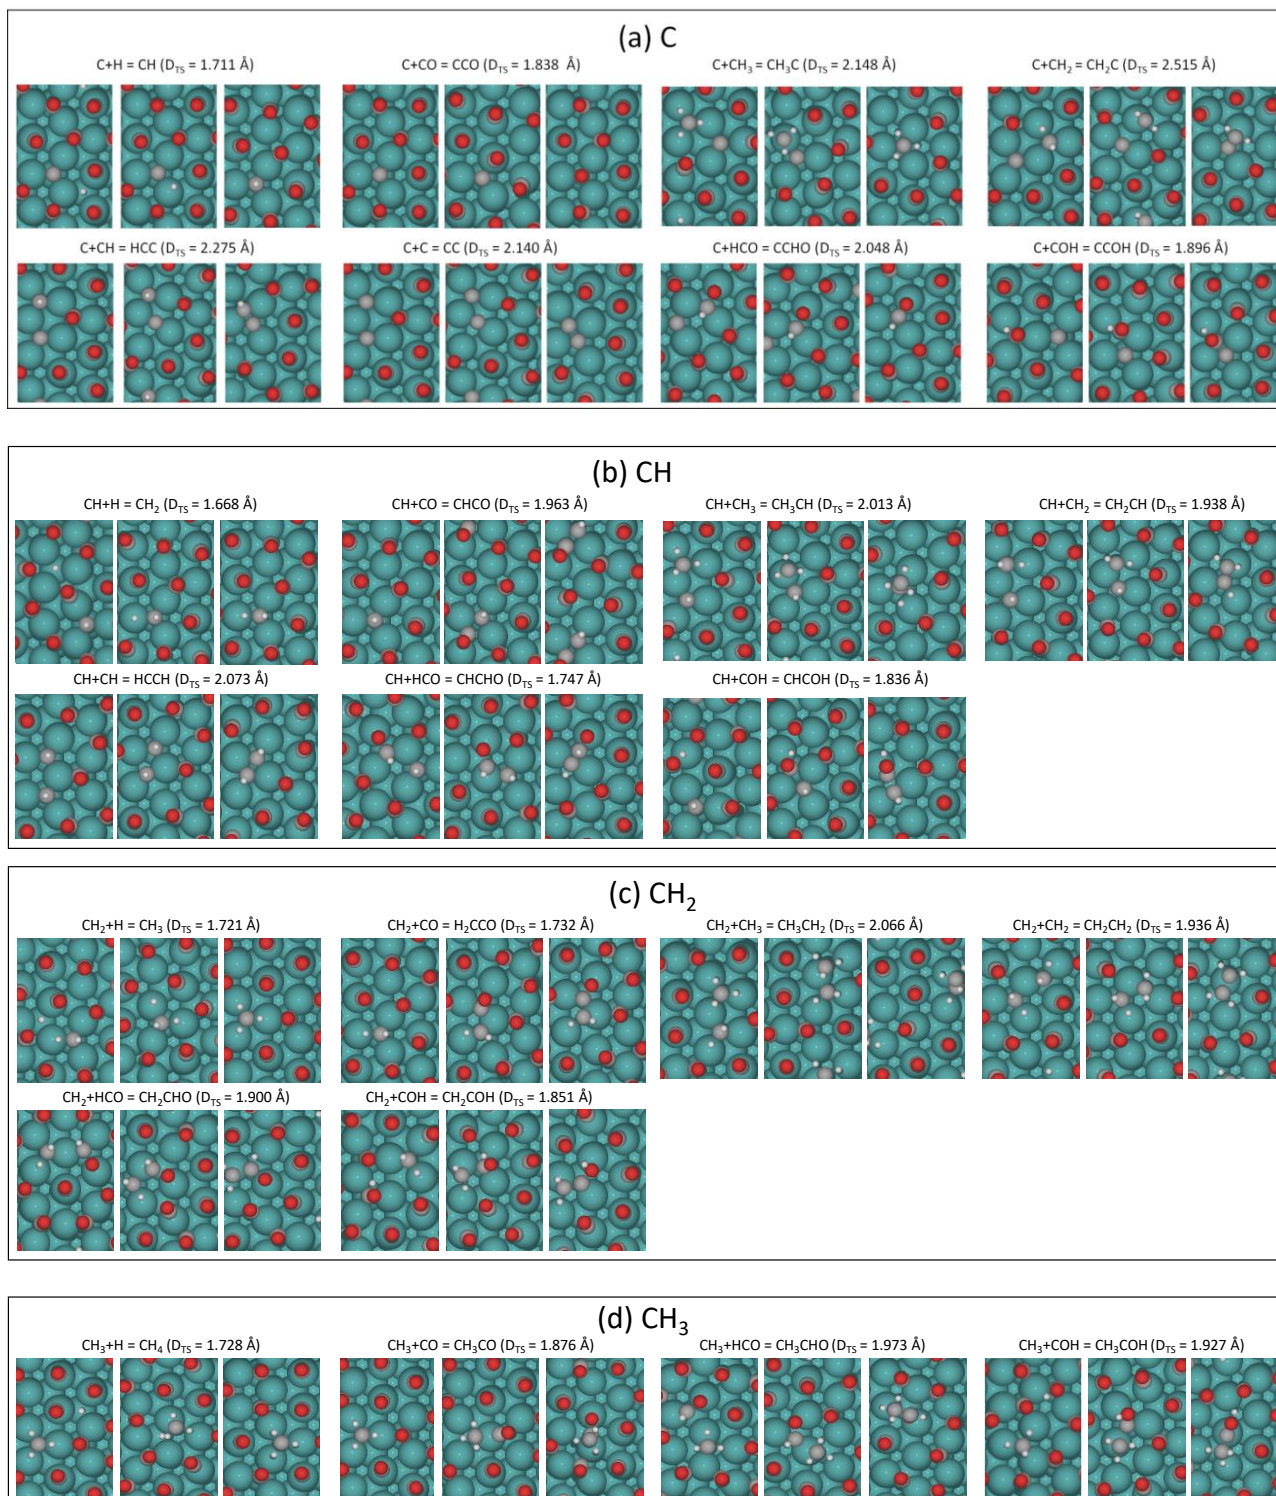

**Figure S7.** Surface structures of the initial (IS), transition (TS) and final (FS) states for the competitive CH<sub>x</sub> hydrogenation and CH<sub>x</sub>-C1 coupling at CO pre-saturation CO coverage. Elementary reactions along with the forming C-H or C-C bond length ( $D_{TS}$ ) in the transition states are given.

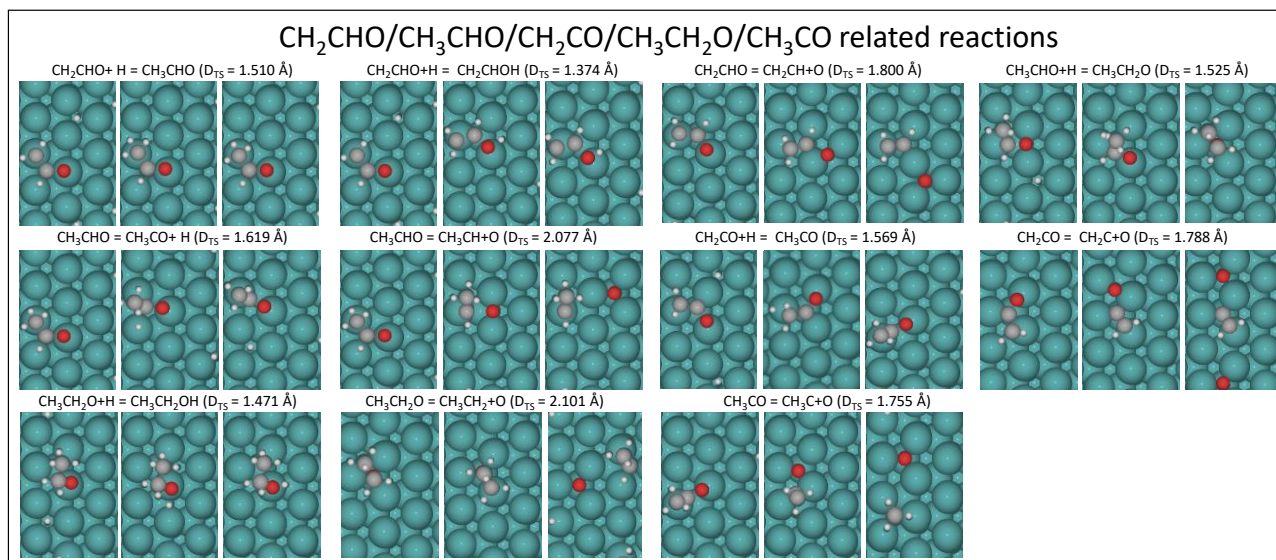

**Figure S8.** Surface structures of the initial (IS), transition (TS) and final (FS) states for CH<sub>2</sub>CHO/CH<sub>3</sub>CHO/CH<sub>2</sub>CO/CH<sub>3</sub>CH<sub>2</sub>O/CH<sub>3</sub>CO related reactions at the lowest coverage. Elementary reactions along with the forming/dissociating C-X bond length ( $D_{\text{TS}}$ ) in the transition states are given.

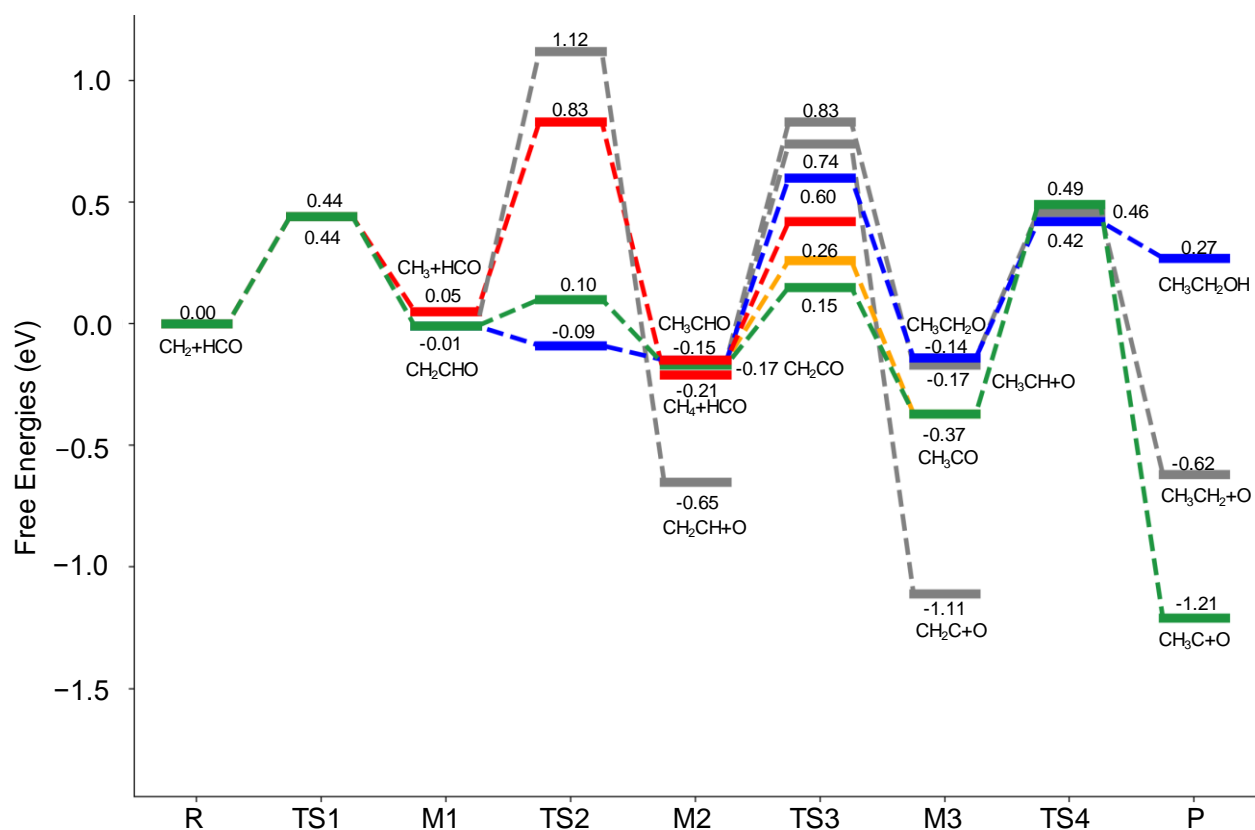

**Figure S9.** Gibbs free energy profiles of CH<sub>2</sub>+HCO development on the basis of gaseous H<sub>2</sub> on Ru(111) at the lowest coverage

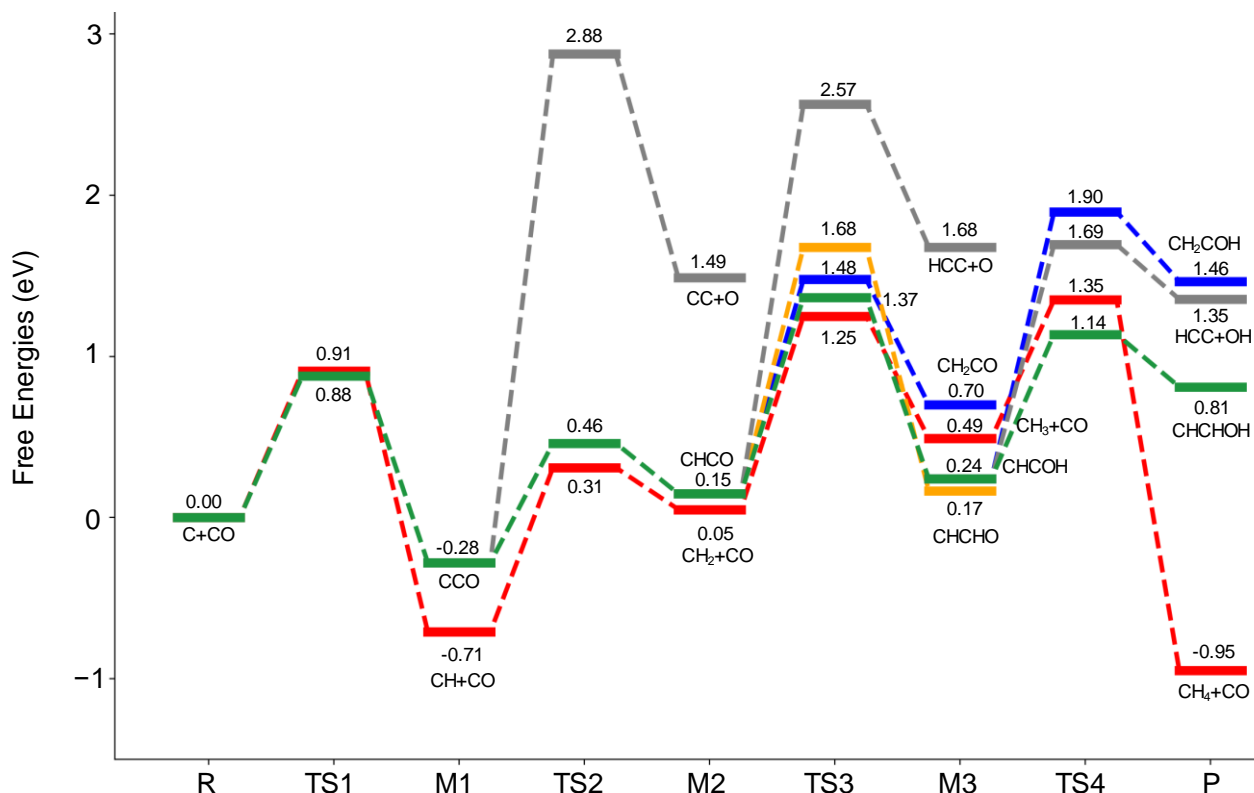

**Figure S10.** Gibbs free energy profiles of C+CO development on the basis of gaseous hydrogen at CO pre-saturation coverage

As shown in Figure S10, the coupling of C + CO, which has a barrier of 0.88 eV and is exergonic by 0.28 eV, is comparable kinetically with C + H reaction, although the coupling of C + CH<sub>3</sub>, C + HCO, and C + CH has lower barrier and is more exergonic (0.18/−2.47 eV, 0.25/−1.14 eV, and 0.25/−1.14 eV, respectively, Figure S5a). Starting from CCO, CCO is more favored to be hydrogenated into CHCO, which has a barrier of 0.74 eV and is endergonic by 0.43 eV, while CCO dissociation into CC + O has a higher barrier (3.16 eV) and is much more endergonic (1.77 eV), due to its upright adsorption configuration. Afterwards, CHCO stepwise hydrogenation to CHCOH, CH<sub>2</sub>CO, and CHCHO has barriers of 1.22, 1.33, and 1.53 eV and reaction free energies of 0.09, 0.55, and −0.02 eV, respectively, while CHCO dissociation into HCC + O has a barrier of 2.42 eV and is endergonic by 1.53 eV. The further hydrogenation of CHCOH to CHCHOH has a barrier of 0.90 eV and is endergonic by 0.57 eV. Combined with the results in Figure S5a, the barrier for the stepwise hydrogenation from C to CH<sub>4</sub> is 0.91, 1.02, 1.20, and 0.86 eV and the reaction free energy is −0.71, 0.76, 0.44, and −1.44 eV, respectively. Starting from C + CO, the most favored route is CH<sub>4</sub> formation, which has an apparent barrier of 1.35 eV and is exergonic by 1.05 eV, and the second most favored route is CCO → CHCO → CHCOH → CHCHOH, which has an apparent barrier of 1.37 eV and is endergonic by 0.81 eV. Thermodynamically, CH<sub>4</sub> formation at FTS initial reaction stage is much more favored. Along with the formation of CH<sub>4</sub>, the first C2 initiator is produced on the surface.

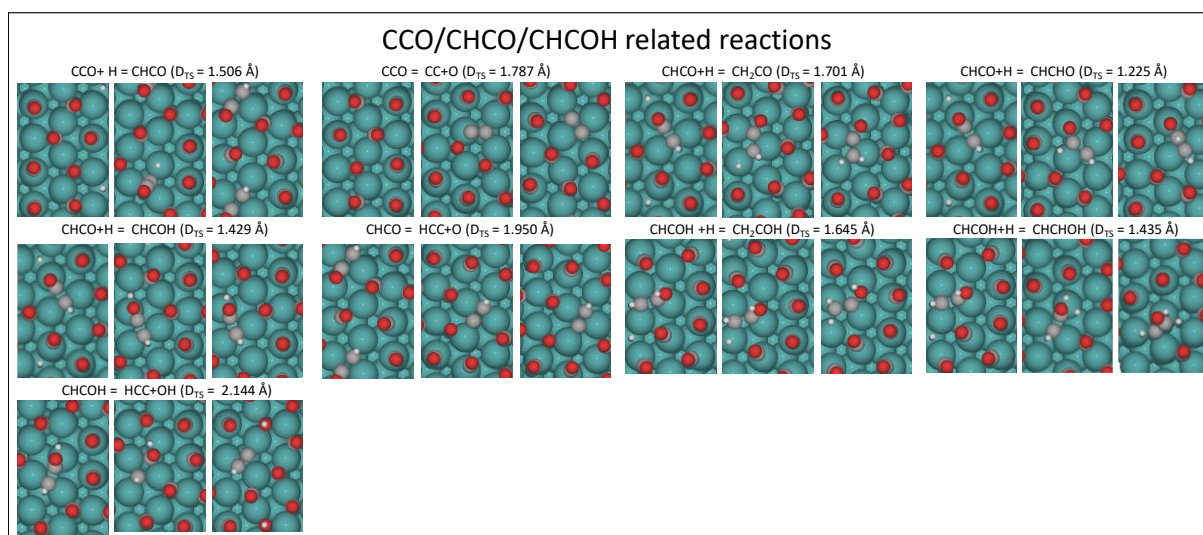

**Figure S11.** Surface structures of the initial (IS), transition (TS) and final (FS) states for the CCO/CHCO/CHCOH related reactions at CO pre-saturation coverage. Elementary reactions along with the forming/dissociating C-X bond length ( $D_{\text{TS}}$ ) in the transition states are given.

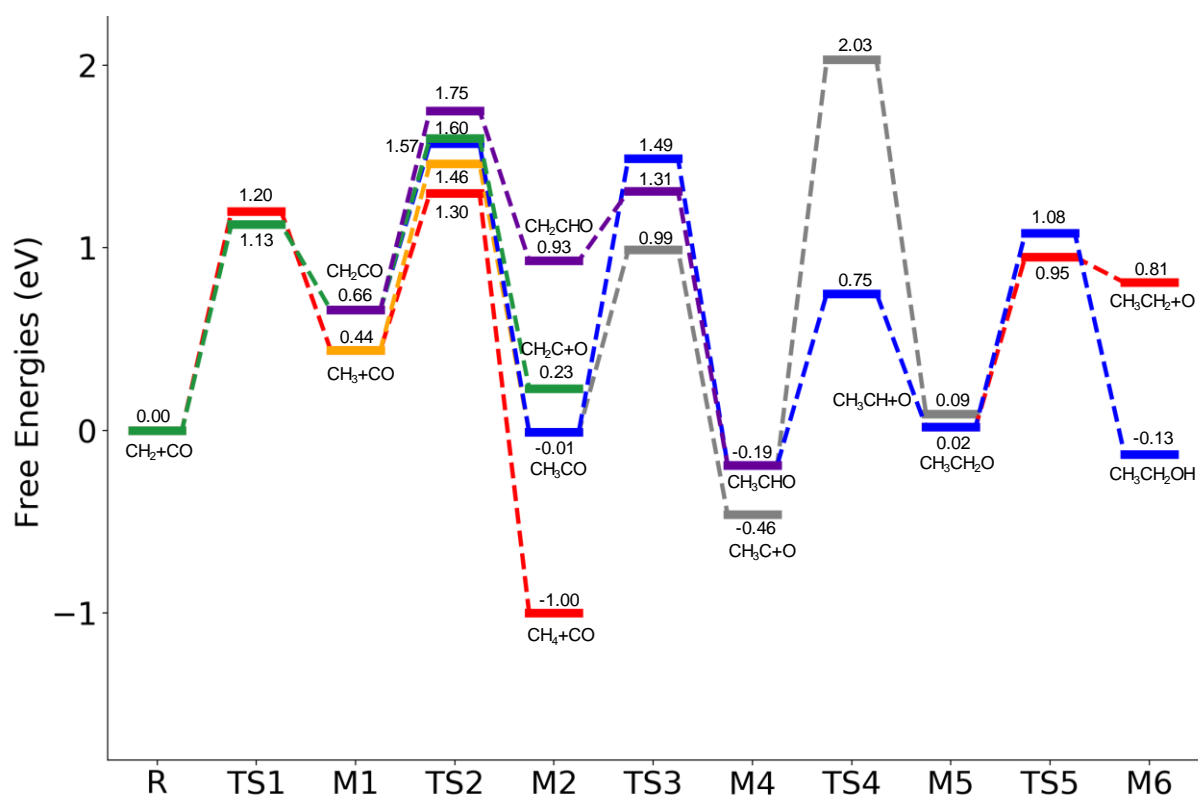

**Figure S12.** Gibbs free energy profiles of  $\text{CH}_2 + \text{CO}$  development on the basis of gaseous hydrogen at CO pre-saturation coverage

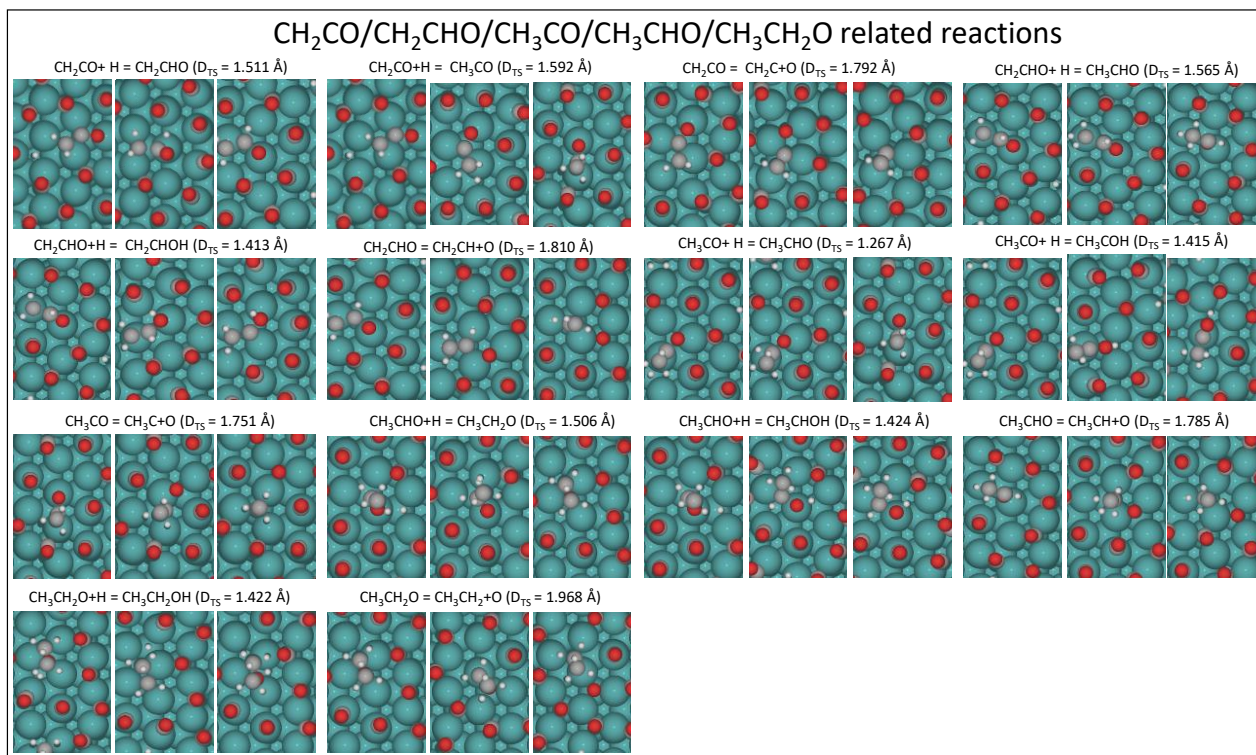

**Figure S13.** Surface structures of the initial (IS), transition (TS) and final (FS) states for the CH<sub>2</sub>CO/CH<sub>2</sub>CHO/CH<sub>3</sub>CHO/CH<sub>3</sub>CH<sub>2</sub>O related reactions at CO pre-saturation coverage. Elementary reactions along with the forming/dissociating C-X bond length (D<sub>TS</sub>) in the transition states are given.

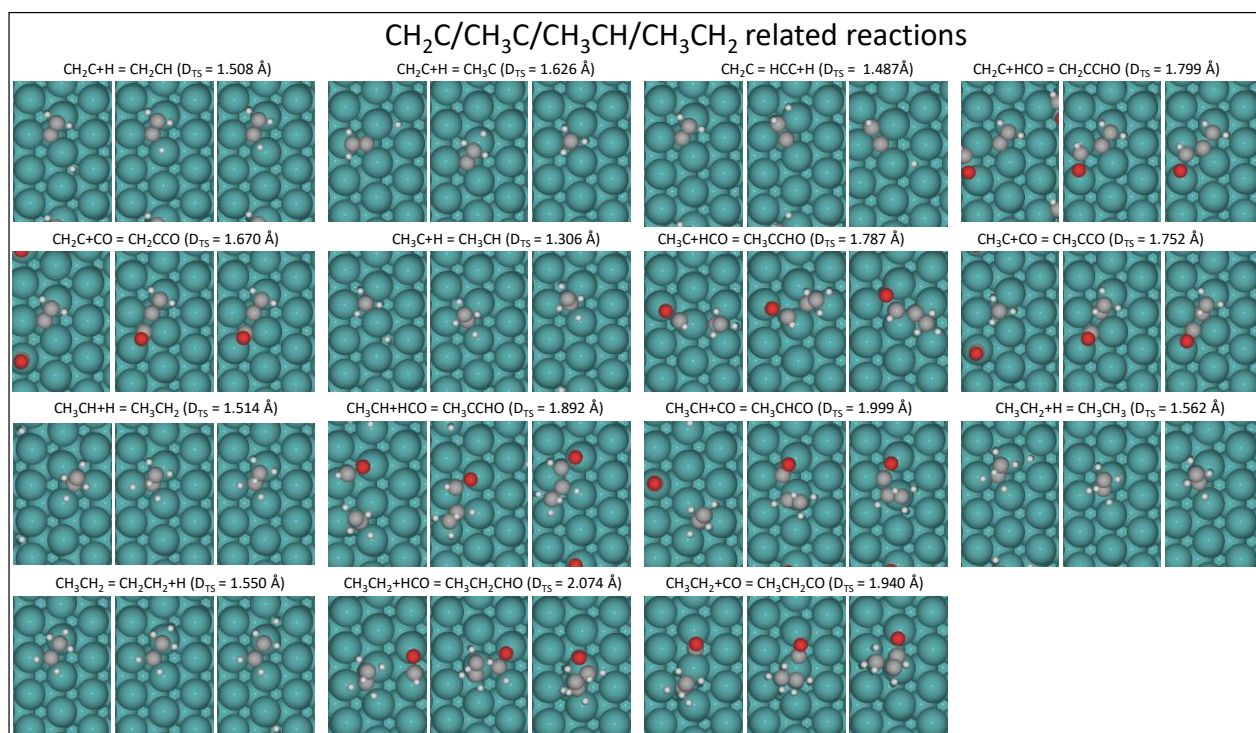

**Figure S14.** Surface structures of the initial (IS), transition (TS) and final (FS) states for the CH<sub>2</sub>C/CH<sub>3</sub>C/CH<sub>3</sub>CH/CH<sub>3</sub>CH<sub>2</sub> related reactions at the lowest coverage. Elementary reactions along with the forming/dissociating C-X bond length (D<sub>TS</sub>) in the transition states are given.

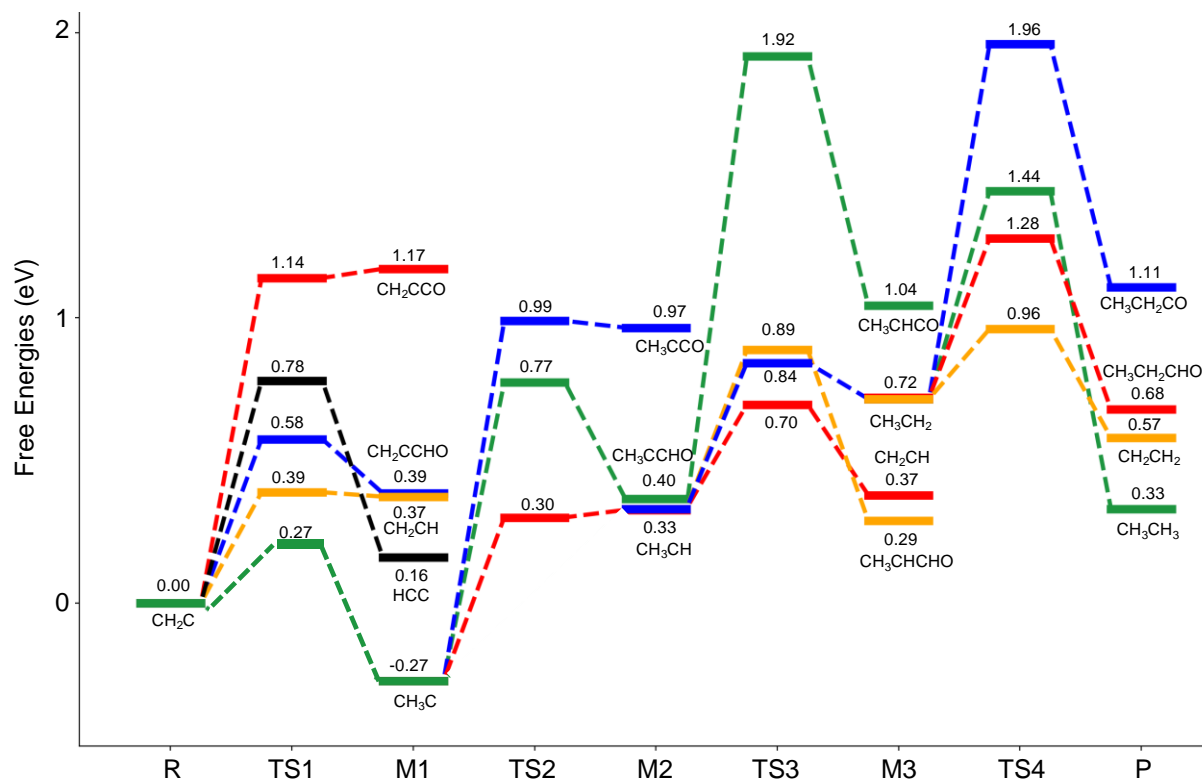

**Figure S15.** Gibbs free energy profiles of  $\text{CH}_2\text{C}$  development on the basis of gaseous hydrogen on Ru(111) at the lowest coverage. And the calculated  $\text{CH}_2\text{CH}$  related reactions

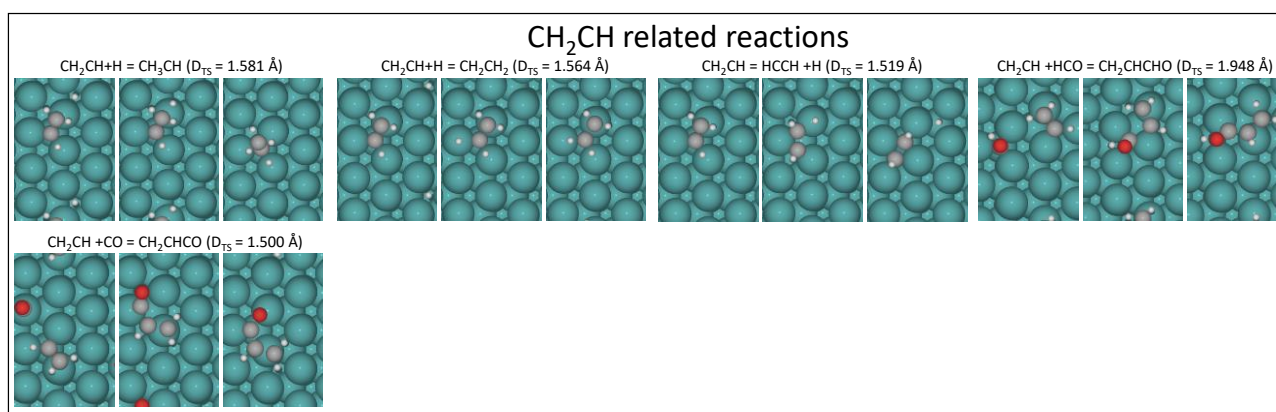

**Figure S16.** Surface structures of the initial (IS), transition (TS) and final (FS) states for the  $\text{CH}_2\text{CH}$  related reactions at the lowest coverage. Elementary reactions along with the forming/dissociating C-X bond length ( $D_{\text{TS}}$ ) in the transition states are given.

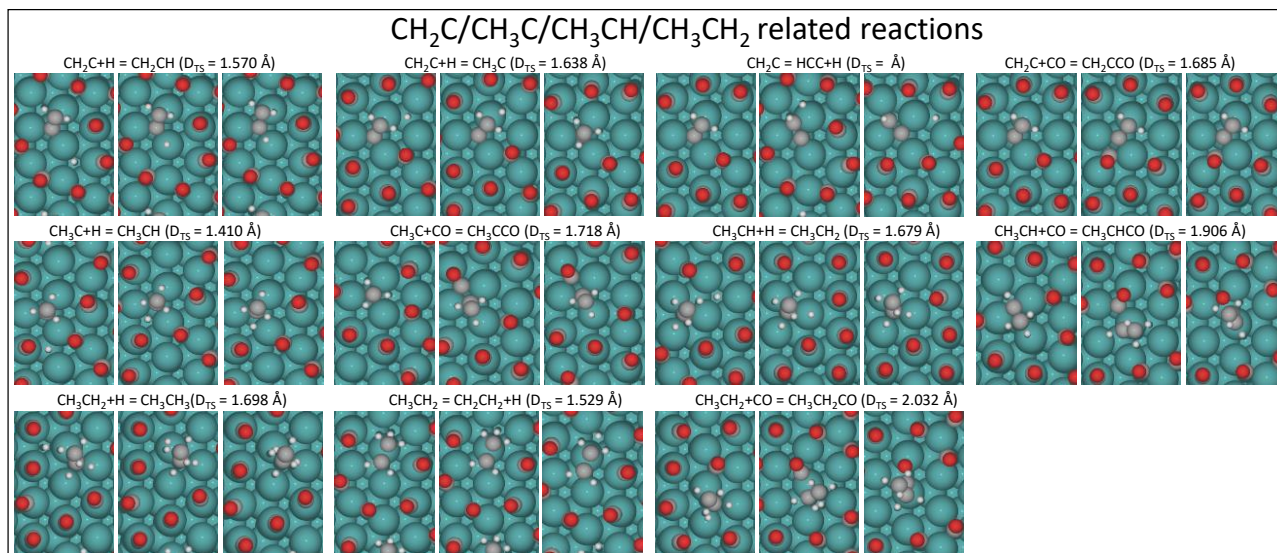

**Figure S17.** Surface structures of the initial (IS), transition (TS) and final (FS) states for the CH<sub>2</sub>C/CH<sub>3</sub>C/CH<sub>3</sub>CH/CH<sub>3</sub>CH<sub>2</sub> related reactions at CO pre-saturation coverage. Elementary reactions along with the forming/dissociating C-X bond length (D<sub>TS</sub>) in the transition states are given.

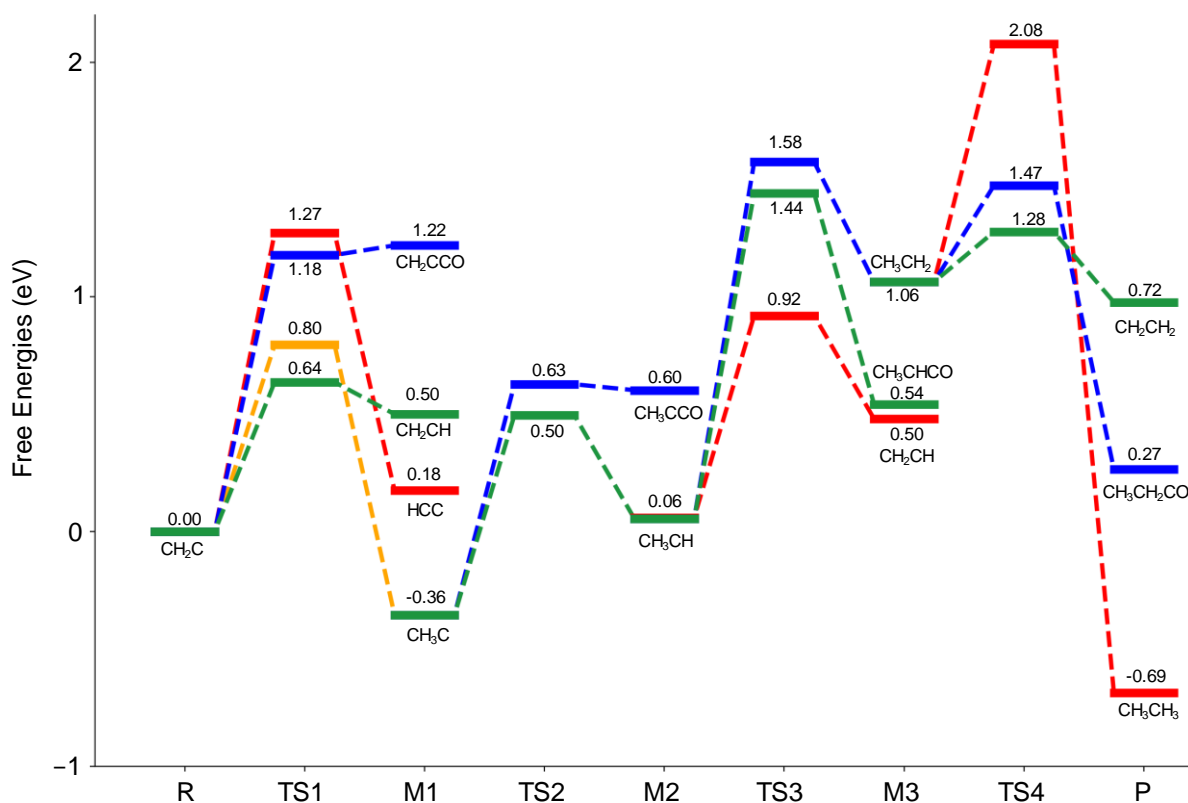

**Figure S18.** Gibbs free energy profiles of CH<sub>2</sub>C and CH<sub>3</sub>C development on the basis of gaseous H<sub>2</sub> at CO pre-saturation coverage

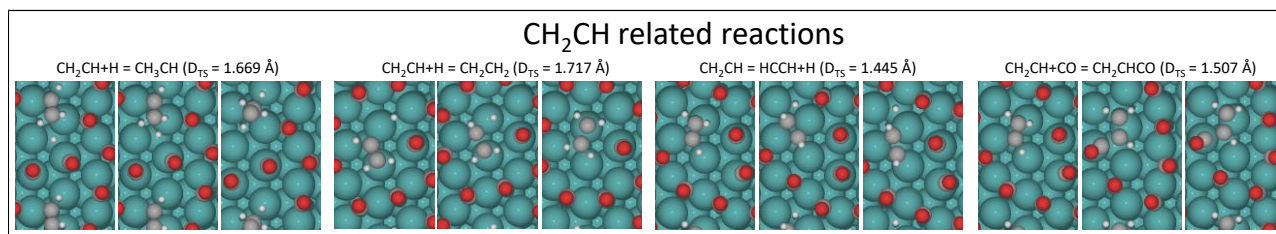

**Figure S19.** Surface structures of the initial (IS), transition (TS) and final (FS) states for the CH<sub>2</sub>CH related reactions at CO pre-saturation coverage. Elementary reactions along with the forming/dissociating C-X bond length ( $D_{\text{TS}}$ ) in the transition states are given.

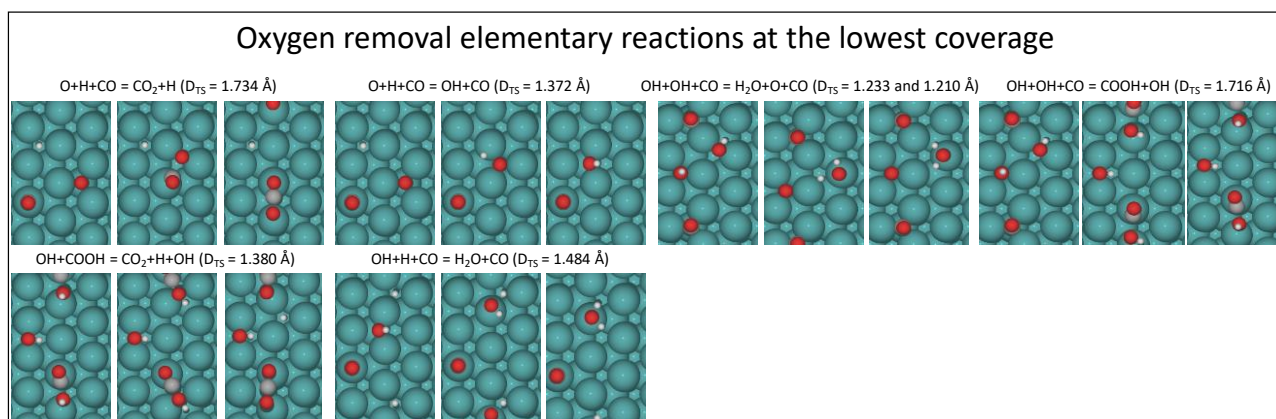

**Figure S20.** Surface structures of the initial (IS), transition (TS) and final (FS) states for the elementary reactions involved in oxygen removal at the lowest coverage. Elementary reactions along with the forming/dissociating C-X bond length ( $D_{\text{TS}}$ ) in the transition states are given.

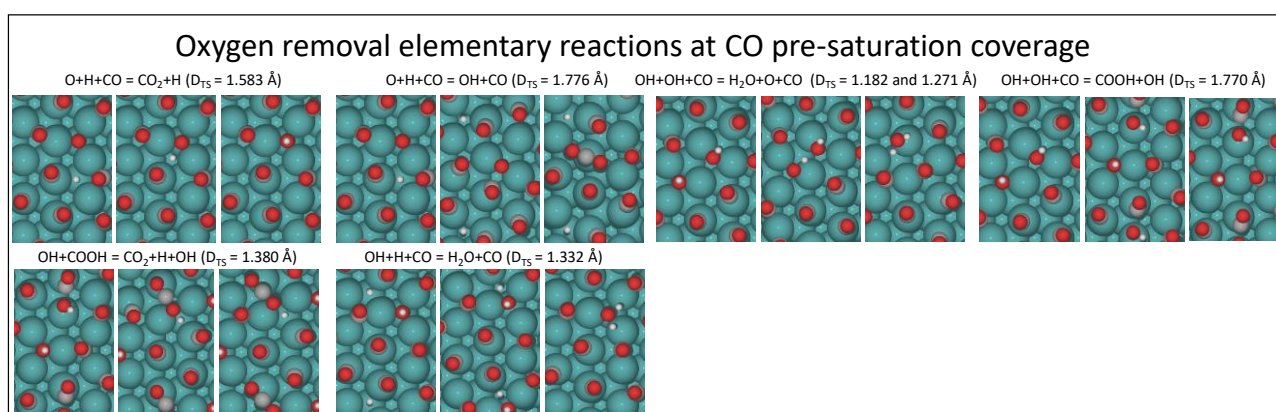

**Figure S21.** Surface structures of the initial (IS), transition (TS) and final (FS) states for the elementary reactions involved in oxygen removal at the highest CO coverage. Elementary reactions along with the forming/dissociating C-X bond length ( $D_{\text{TS}}$ ) in the transition states are given.

Table S3. The reaction energies (eV) of RDS of our proposed mechanism at different CO/H coverage.

| $n_{\text{CO}}$ | $n_{\text{H}}$ | $E_{\text{r}}(\text{CH}_3\text{CO} \rightarrow \text{CH}_3\text{C}+\text{O})$ | $E_{\text{r}}(\text{CH}_3+\text{CO} \rightarrow \text{CH}_3\text{CO})$ |
|-----------------|----------------|-------------------------------------------------------------------------------|------------------------------------------------------------------------|
| 1               | 4              | -0.67                                                                         | 0.30                                                                   |
| 1               | 0              | -0.84                                                                         | 0.62                                                                   |
| 2               | 2              | -0.56                                                                         | 0.29                                                                   |
| 2               | 0              | -0.77                                                                         | 0.70                                                                   |
| 3               | 0              | -0.66                                                                         | 0.21                                                                   |
| 6               | 0              | -0.84                                                                         | -0.05                                                                  |

At given CO pre-coverage (0.11 and 0.22 ML, respectively), it is found that the reaction of  $\text{CH}_3\text{CO} \rightarrow \text{CH}_3\text{C}+\text{O}$  become more exergonic (-0.67 vs. -0.84 eV; and -0.56 vs. -0.77 eV, respectively) with the decrease of H coverage, while totally opposite trend is found for the reaction of  $\text{CH}_3+\text{CO} \rightarrow \text{CH}_3\text{CO}$ , i.e., it becomes more endergonic (0.30 vs. 0.62 eV and 0.29 vs. 0.70 eV, respectively) with the decrease of H coverage. This indicated that decreasing H coverage can gradually promote  $\text{CH}_3\text{CO} \rightarrow \text{CH}_3\text{C}+\text{O}$ , while inhibit  $\text{CH}_3+\text{CO} \rightarrow \text{CH}_3\text{CO}$ .

With the increase of CO pre-coverage (0.11, 0.22 and 0.33 ML) the reaction of  $\text{CH}_3\text{CO} \rightarrow \text{CH}_3\text{C}+\text{O}$  become less exergonic (-0.84; -0.77; and -0.66 eV, respectively), while the reaction of  $\text{CH}_3+\text{CO} \rightarrow \text{CH}_3\text{CO}$  is endergonic at 0.11, 0.22 and 0.33 ML CO pre-coverage (0.62, 0.70 and 0.21 eV, respectively). At the highest CO pre-coverage (0.67 ML), the reaction of  $\text{CH}_3\text{CO} \rightarrow \text{CH}_3\text{C}+\text{O}$  is exergonic by 0.84 eV, and the reaction of  $\text{CH}_3+\text{CO} \rightarrow \text{CH}_3\text{CO}$  becomes exergonic by 0.05 eV. This abnormal change is due to the more sensitive lateral interaction of CO molecules at high coverage than at low coverage.

Along with the computed energetics of the formation of the first and second C-C bonds, their subsequent development, the formation of  $\text{CH}_3\text{CHO}$ ,  $\text{CH}_3\text{CH}_2\text{OH}$ ,  $\text{CH}_2\text{CH}$ , and  $\text{HCCH}$ , and the removal of surface oxygen, we also performed micro-kinetics analysis to estimate the reaction rate under the consideration of concentrations of surface species and surface adsorption sites for adsorption. Using a common energy reference ( $\text{H}_2$ ,  $\text{CO}$ , and  $\text{H}_2\text{O}$  or  $\text{CO}_2$ ), we summarized all rate-determining steps (RDS) of  $\text{CH}_4$ ,  $\text{C}_2$  chain initiator,  $\text{CH}_3\text{CHO}$ ,  $\text{CH}_3\text{CH}_2\text{OH}$ ,  $\text{CH}_2\text{CH}_2$ ,  $\text{HCCH}$  and possible  $\text{C}_3$  chain initiator at the lowest coverage (Figure S22) and at  $\text{CO}$  pre-saturation coverage (Figure S23). Full energy profiles are divided by three stages:  $\text{CO}$  activation, first C-C bond formation, and second C-C bond formation. Our proposed chain growth mechanism was consecutively plotted, and the highest point of the energy profile of the formation of  $\text{CH}_3\text{CHO}$ ,  $\text{CH}_3\text{CH}_2\text{OH}$ ,  $\text{CH}_2\text{CH}_2$ , and  $\text{HCCH}$  were marked with red stars. Micro-kinetics analysis of the removal of surface oxygen also was done and discussed below.

At the lowest coverage (Figure S22), the formation of  $\text{CH}_4$  and the first C-C coupling share the same intermediate  $\text{CH}_2$ , and they are competitive. Next, the formation of  $\text{CH}_3\text{CHO}$  and  $\text{CH}_3\text{CH}_2\text{OH}$  share the same intermediate ( $\text{CH}_3\text{CO}$ ) with the formation of  $\text{C}_2$  initiator. Similarly, the formation of  $\text{CH}_2\text{CH}_2$  and  $\text{HCCH}$  formation will be competitive with the formation of  $\text{C}_3$  initiator.

The first C-C bond formation at the lowest coverage has the RDS of  $\text{CH}_3\text{CO} \rightarrow \text{CH}_3\text{C}+\text{O}$  with an apparent barrier of  $-0.23$  eV, and this step is irreversible because of its strong exergonicity ( $-1.93$  eV). Correcting these energies with  $\text{CO}$ ,  $\text{H}_2$  and  $\text{H}_2\text{O}$  as references, the apparent barrier of  $\text{CH}_4$  formation is higher than that of the formation of  $\text{C}_2$  initiator ( $0.11$  vs.  $-0.23$  eV), while the formation of  $\text{CH}_3\text{CHO}$  and  $\text{CH}_3\text{CH}_2\text{OH}$  has close apparent barrier with the formation of  $\text{C}_2$  initiator ( $-0.28$  vs.  $-0.23$  eV). The second C-C coupling,  $\text{CH}_3\text{CH}+\text{HCO} \rightarrow \text{CH}_3\text{CHCHO}$ , has an apparent barrier of  $-0.93$  eV and is exergonic by  $1.52$  eV. The highest point of the formation of  $\text{CH}_2\text{CH}_2$  and  $\text{HCCH}$  is  $-1.06$  and  $-1.11$  eV in their own free energy profiles, respectively. These corrected apparent barriers will be used to obtain rate constant of their formation rate.

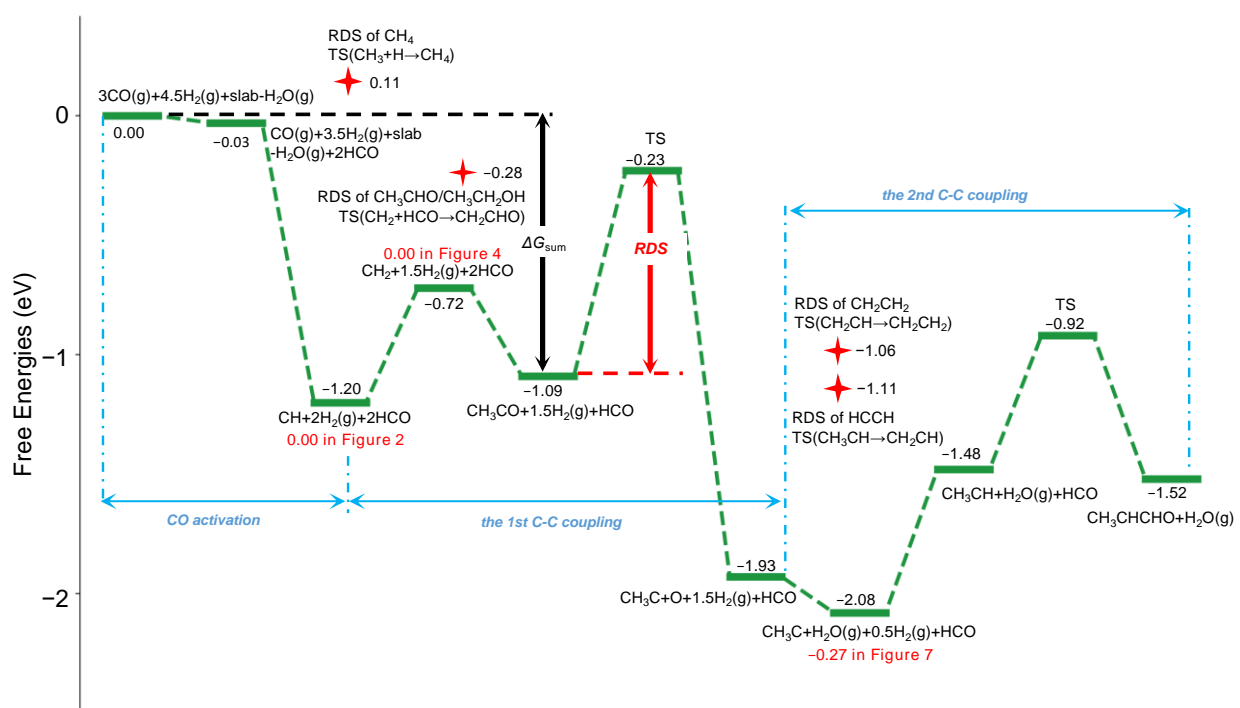

Figure S22. Full scheme of micro-kinetics analysis at the lowest coverage.

At CO pre-saturation coverage with CO, H<sub>2</sub> and CO<sub>2</sub> as references (Figure S23), the first C-C bond formation has the RDS of CH<sub>3</sub>+6CO → CH<sub>3</sub>CO+5CO with an apparent barrier of -2.59 eV and is exergonic by 4.06 eV. The highest point of the first C-C bond formation is 0.53 eV lower than that of CO activation (CO self-promoting hydrogenation route<sup>4</sup>). The second C-C coupling of CH<sub>3</sub>CH+CO → CH<sub>3</sub>CHCO has an apparent barrier of -4.21 eV and is exergonic by 5.11 eV. In addition, the formation of CH<sub>4</sub>, CH<sub>3</sub>CHO, CH<sub>3</sub>CH<sub>2</sub>OH, CH<sub>2</sub>CH<sub>2</sub>, and HCCH has an apparent barrier of -2.75, -2.56, -2.56, -4.08, and -4.67 eV, respectively.

Since the formation of CH<sub>4</sub>, CH<sub>3</sub>CHO, and CH<sub>3</sub>CH<sub>2</sub>OH occurs before the first C-O bond dissociation, they will compete with the formation of C2 initiator, while the formation of CH<sub>2</sub>CH<sub>2</sub> and HCCH takes place after the first C-O bond dissociation, they will be competitive with the formation of the C3 initiator. Consequently, the formation of C2 initiator is not favored kinetically compared with that of methane (-2.75 vs. -2.59 eV), however, high CO coverage inhibits H<sub>2</sub> adsorption and the subsequent hydrogenation steps, the formation of C2 initiator can be promoted at CO pre-saturation coverage as discussed below.

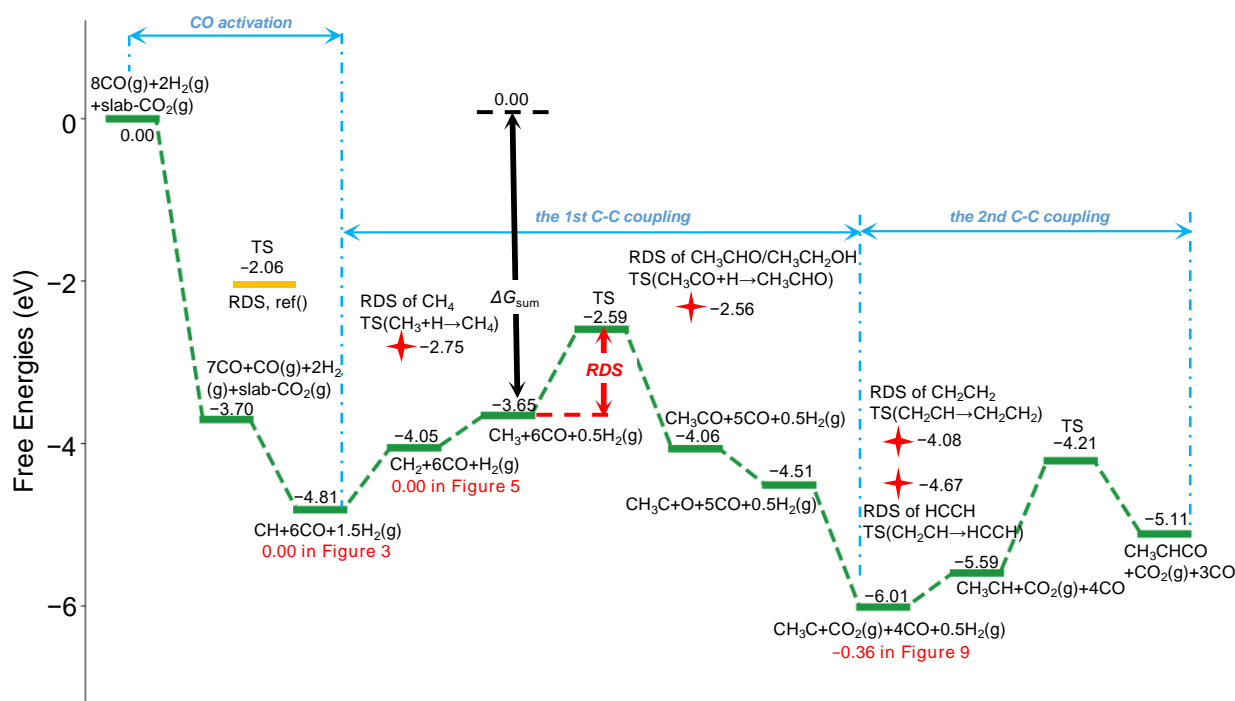

Figure S23. The full scheme of micro-kinetics analysis at CO pre-saturation coverage.

On the basis of our thermodynamics results, a complete reaction network starting from gaseous CO and H<sub>2</sub> can be constructed by the following elementary reactions (Table S4). To embody lateral interactions, the adsorption of C1 species and C2 species is thought respectively to occupy one or two sites.

Table S4. The elementary steps of chain growth process, CH<sub>4</sub>, CH<sub>3</sub>CHO, CH<sub>3</sub>CH<sub>2</sub>OH, CH<sub>2</sub>CH<sub>2</sub>, and HCCH formation

| Reaction at lowest coverage(RL)                                             |      | Reaction at CO pre-saturation coverage (RH)                                           |      |
|-----------------------------------------------------------------------------|------|---------------------------------------------------------------------------------------|------|
| CO activation                                                               |      |                                                                                       |      |
| CO(g)+*=CO*                                                                 | RL1  | CO(g)+*=CO*                                                                           | RH1  |
| H <sub>2</sub> (g)+2*=2H*                                                   | RL2  | H <sub>2</sub> (g)+2*=2H*                                                             | RH2  |
| CO*+H*=HCO*                                                                 | RL3  |                                                                                       |      |
| 1st C-C coupling                                                            |      |                                                                                       |      |
| C*+H*=CH*+*                                                                 | RL4  | C*+H*+6CO*=CH*+*+6CO*                                                                 | RH3  |
| CH*+H*=CH <sub>2</sub> *+*                                                  | RL5  | CH*+H*+6CO*=CH <sub>2</sub> *+*+6CO*                                                  | RH4  |
| CH <sub>2</sub> *+HCO*=CH <sub>2</sub> CHO*+*                               | RL6  | CH <sub>2</sub> *+6CO*+H*=CH <sub>3</sub> *+6CO*+*                                    | RH5  |
| CH <sub>2</sub> CHO*+*=CH <sub>2</sub> CO*+H*                               | RL7  | CH <sub>3</sub> *+6CO*=CH <sub>3</sub> CO*+5CO*+*                                     | RH6  |
| CH <sub>2</sub> CO*+H*=CH <sub>3</sub> CO*                                  | RL8  | CH <sub>3</sub> CO*+*+5CO*=CH <sub>3</sub> C*+O*+5CO*                                 | RH7  |
| CH <sub>3</sub> CO*+*=CH <sub>3</sub> C*+O*                                 | RL9  |                                                                                       |      |
| 2nd C-C coupling                                                            |      |                                                                                       |      |
| CH <sub>3</sub> C*+H*=CH <sub>3</sub> CH*+*                                 | RL10 | CH <sub>3</sub> C*+H*+5CO*=CH <sub>3</sub> CH*+*+5CO*                                 | RH8  |
| CH <sub>3</sub> CH*+HCO*=CH <sub>3</sub> CHCHO*+*                           | RL11 | CH <sub>3</sub> CH*+5CO*=CH <sub>3</sub> CHCO*+*+4CO*                                 | RH9  |
| removal of surface O                                                        |      |                                                                                       |      |
| 2O*+2H*=2OH*+2*                                                             | RL12 | 2O*+5CO*+2H*=2OH*+5CO*+2*                                                             | RH10 |
| 2OH*=H <sub>2</sub> O*+O*                                                   | RL13 | 2OH*+5CO*=H <sub>2</sub> O*+O*+65O*                                                   | RH11 |
| H <sub>2</sub> O*=H <sub>2</sub> O(g)+*                                     | RL14 | H <sub>2</sub> O*+5CO*+O*=H <sub>2</sub> O(g)+5CO*+O*                                 | RH12 |
| O*+CO*=CO <sub>2</sub> *+*                                                  | RL15 | O*+6CO*=CO <sub>2</sub> *+6CO*                                                        | RH13 |
| CO <sub>2</sub> *=CO <sub>2</sub> (g)                                       | RL16 | CO <sub>2</sub> *+6CO*=CO <sub>2</sub> (g)+*+6CO*                                     | RH14 |
| methane formation                                                           |      |                                                                                       |      |
| CH <sub>2</sub> *+H*=CH <sub>3</sub> *+*                                    | RL17 | CH <sub>2</sub> *+H*+6CO*=CH <sub>3</sub> *+*+6CO*                                    | RH15 |
| CH <sub>3</sub> *+H*=CH <sub>4</sub> *+*                                    | RL18 | CH <sub>3</sub> *+H*+6CO*=CH <sub>4</sub> *+*+6CO*                                    | RH16 |
| CH <sub>4</sub> *=CH <sub>4</sub> (g)                                       | RL19 | CH <sub>4</sub> *+6CO*=CH <sub>4</sub> (g)+6CO*                                       | RH17 |
| CH <sub>3</sub> CHO and CH <sub>3</sub> CH <sub>2</sub> OH formation        |      |                                                                                       |      |
| CH <sub>2</sub> CHO*+H*=CH <sub>3</sub> CHO*+*                              | RL20 | CH <sub>3</sub> CO*+H*+5CO*=CH <sub>3</sub> CHO*+*+5CO*                               | RH18 |
| CH <sub>3</sub> CHO*=CH <sub>3</sub> CHO(g)+*                               | RL21 | CH <sub>3</sub> CHO*+5CO*=CH <sub>3</sub> CHO(g)+5CO*                                 | RH19 |
| CH <sub>3</sub> CHO*+H*=CH <sub>3</sub> CH <sub>2</sub> O*+*                | RL22 | CH <sub>3</sub> CHO*+5CO*+H*=CH <sub>3</sub> CH <sub>2</sub> O*+*+5CO*                | RH20 |
| CH <sub>3</sub> CH <sub>2</sub> O*+H*=CH <sub>3</sub> CH <sub>2</sub> OH*+* | RL23 | CH <sub>3</sub> CH <sub>2</sub> O*+H*+5CO*=CH <sub>3</sub> CH <sub>2</sub> OH*+*+5CO* | RH21 |
| CH <sub>3</sub> CH <sub>2</sub> OH*=CH <sub>3</sub> CH <sub>2</sub> OH(g)+* | RL24 | CH <sub>3</sub> CH <sub>2</sub> OH*+5CO*=CH <sub>3</sub> CH <sub>2</sub> OH(g)+5CO*   | RH22 |
| CH <sub>2</sub> CH <sub>2</sub> and HCCH formation                          |      |                                                                                       |      |
| CH <sub>3</sub> C*+H*=CH <sub>3</sub> CH*+*                                 | RL25 | CH <sub>3</sub> C*+H*+5CO*=CH <sub>3</sub> CH*+*+5CO*                                 | RH23 |
| CH <sub>3</sub> CH*+*=CH <sub>2</sub> CH*+H*                                | RL26 | CH <sub>3</sub> CH*+*+5CO*=CH <sub>2</sub> CH*+H*+5CO*                                | RH24 |
| CH <sub>2</sub> CH*+H*=CH <sub>2</sub> CH <sub>2</sub> *+*                  | RL27 | CH <sub>2</sub> CH*+H*+5CO*=CH <sub>2</sub> CH <sub>2</sub> *+*+5CO*                  | RH25 |
| CH <sub>2</sub> CH <sub>2</sub> *=CH <sub>2</sub> CH <sub>2</sub> (g)+*     | RL28 | CH <sub>2</sub> CH <sub>2</sub> *+5CO*=CH <sub>2</sub> CH <sub>2</sub> (g)+*+5CO*     | RH26 |
| CH <sub>2</sub> CH*+*=HCCH*+H*                                              | RL29 | CH <sub>2</sub> CH*+*+5CO*=HCCH*+H*+5CO*                                              | RH27 |

Since surface O can be removed as H<sub>2</sub>O(g) and CO<sub>2</sub>(g) at the lowest and CO pre-saturation coverage, respectively, we used CO and H<sub>2</sub> as a common energy reference. On the basis of material conservation principle under the proposed reaction conditions (423 K, 30 atm, and  $p_{H_2}/p_{CO}/p_{CH_4}/p_{CO_2}/p_{H_2O} = 10/5/2/2/1$ ), the energy reference of starting point (CH\*) can be corrected to -1.20 eV and -4.81 eV at the lowest and CO pre-saturation coverage, respectively.

Starting from CH\* and CH\*+6CO\*, the highest point of the full energy profile of the first C-C bond formation, the transition state of the breaking of C-O bond in CH<sub>3</sub>CO\* and the coupling of CH<sub>3</sub> + CO which represents the rate-determining step (RDS), should determine the rate of the first C-C bond formation at the lowest and CO pre-saturation coverage, respectively. In our simplified micro-kinetics model, all other steps except RDS are assumed to have quasi-equilibrium. Therefore, the rate of the first C-C coupling reaction can be expressed by Eq. S1 at the lowest coverage (RL) and Eq. S2 at CO pre-saturation coverage (RH):

$$r_{RL, C2} = k_{RL9}^+ [CH_3CO^*][^*] \quad \text{Eq. S1}$$

$$r_{RH, C2} = k_{RH6}^+ [CH_3^*][CO^*]^6 \quad \text{Eq. S2}$$

wherein,  $k_{RL9}^+$  and  $k_{RH6}^+$  are the respective forward rate constant of RL9 and RH6 (Table S4),  $r_{RL, C2}$  and  $r_{RH, C2}$  are the respective rate of the first C-C coupling at the lowest and CO pre-saturation coverage, and the concentration of surface species (also surface free sites),  $[X]$ , represents the number of the adsorbed X per square meter (/m<sup>2</sup>).

Because of the proposed quasi-equilibrium, an equilibrium constant of RL8 can be expressed by Eq. S3:

$$K_{RL8} = ([CH_3CO^*][^*])/([CH_2CO^*][H]^*) \quad \text{Eq. S3}$$

Wherein, for a given reaction RL<sub>n</sub> or RH<sub>n</sub>, the equilibrium constant should be  $K_{RLn}$  or  $K_{RHn}$

So,

$$[CH_3CO^*][^*] = K_{RL8}[CH_2CO^*][H^*] \quad \text{Eq. S4}$$

Similarly,

$$[CH_2CO^*][H^*] = K_{RL7}[CH_2CHO^*][^*] \quad \text{Eq. S5}$$

$$[CH_2CHO^*][^*] = K_{RL6}[CH_2^*][HCO^*] \quad \text{Eq. S6}$$

Then,

$$[CH_3CO^*][^*] = K_{RL8}K_{RL7}K_{RL6}K_{RL5}K_{RL4}K_{RL3}K_{RL2}K_{RL1} \cdots [CO(g)]^2[H_2(g)]^{2.5}[H_2O(g)]^{-1}[^*]^2 \quad \text{Eq. S7}$$

Substituting Eq. S7 to Eq. S1, we can get Eq. S8

$$r_{RL, C2} = k_{RL9}^+ K_{RL8} K_{RL7} K_{RL6} K_{RL5} K_{RL4} K_{RL3} K_{RL2} K_{RL1} \cdots [CO(g)]^2[H_2(g)]^{2.5}[H_2O(g)]^{-1}[^*]^2 \quad \text{Eq. S8}$$

According to the Eyring equation of

$$k = (\kappa k_B T / h) \exp(-\Delta G^\ddagger / RT) \quad \text{Eq. S9}$$

Wherein,  $k$  is the rate constant,  $\Delta G^\ddagger$  is the Gibbs energy of activation,  $\kappa$  is the transmission coefficient,  $k_B$  is the Boltzmann constant,  $T$  is the temperature and  $h$  is the Planck constant.

For an equilibrium reaction,

$$\Delta G_r = -RT \ln K_r \quad \text{Eq. S10}$$

Wherein,  $\Delta G_r$  and  $K_r$  is respective Gibbs free energy and equilibrium constant of reaction.

Substituting Eq. S9 and Eq. S10 to Eq. S8, we can get

$$r_{RL, C2} = (\kappa k_B T / h) \exp[-(\Delta G_{RL9}^\ddagger + \Delta G_{sum, before RL9}) / RT] [CO(g)]^2[H_2(g)]^{2.5}[H_2O(g)]^{-1}[^*]^3 \quad \text{Eq. S11}$$

Wherein,  $\Delta G_{sum, before RDS}$  is the sum of Gibbs free energies of all the elementary reactions before rate-determining step (RDS) and  $\Delta G_{RL9}^\ddagger$  is the barrier of the RDS.

Analogy to that at the lowest coverage, we also can convert Eq. S2 to Eq. S12 on the basis of gaseous CO, H<sub>2</sub> and CO<sub>2</sub> at CO pre-saturation coverage

$$r_{RH, C2} = (\kappa k_B T / h) \exp[-(\Delta G_{RH6}^\ddagger + \Delta G_{sum, before RH6}) / RT] [CO(g)]^8[H_2(g)]^{1.5}[CO_2(g)]^{-1}[^*]^7 \quad \text{Eq. S12}$$

Similarly, the rate of the second C-C formation can be determined by RL11 and RH9 respectively, and the rate equation can finally be expressed by

$$r_{RL, C3} = (\kappa k_B T/h) \exp[-(\Delta G_{RL11}^\ddagger + \Delta G_{sum, before RL11})/RT] [CO(g)]^3 [H_2(g)]^{4.5} [H_2O(g)]^{-2} [*]^3 \quad \text{Eq. S13}$$

$$r_{RH, C3} = (\kappa k_B T/h) \exp[-(\Delta G_{RH9}^\ddagger + \Delta G_{sum, before RH9})/RT] [CO(g)]^9 [H_2(g)]^2 [CO_2(g)]^{-2} [*]^7 \quad \text{Eq. S14}$$

The formation of CH<sub>4</sub> has the RDS of the hydrogenation of CH<sub>3</sub> (Table S4, RL18 at the lowest coverage and RH16 at CO pre-saturation coverage). At the lowest coverage, the formation of CH<sub>3</sub>CHO and CH<sub>3</sub>CH<sub>2</sub>OH has the same RDS of CH<sub>2</sub>+HCO → CH<sub>2</sub>CHO (RL6) and the formation of CH<sub>2</sub>CH<sub>2</sub> and HCCH has the RDS of CH<sub>2</sub>CH\*+H\* → CH<sub>2</sub>CH<sub>2</sub>\*+\* (RL27) and of CH<sub>3</sub>CH\*+\* → CH<sub>2</sub>CH\*+H\* (RL26), respectively. At CO pre-saturation coverage, the formation of CH<sub>3</sub>CHO and CH<sub>3</sub>CH<sub>2</sub>OH has the same RDS of the hydrogenation of CH<sub>3</sub>CO into CH<sub>3</sub>CHO (RH18) and the formation of CH<sub>2</sub>CH<sub>2</sub> and HCCH has the RDS of CH<sub>2</sub>CH\*+H\*+5CO\* → CH<sub>2</sub>CH<sub>2</sub>\*+\*+5CO\* (RH25) and of CH<sub>2</sub>CH\*+\*+5CO\* → HCCH\*+H\*+5CO\* (RH27), respectively. Therefore, we can express the rate of CH<sub>4</sub>, CH<sub>3</sub>CHO, CH<sub>3</sub>CH<sub>2</sub>OH, CH<sub>2</sub>CH<sub>2</sub>, and HCCH formation in the following:

At the lowest coverage,

$$r_{RL, CH4} = k_{RL18}^+ [CH_3^*][H^*] \quad \text{Eq. S15}$$

$$r_{RL, CH3CH2OH/CH3CHO} = k_{RL6}^+ [CH_2^*][HCO^*] \quad \text{Eq. S16}$$

$$r_{RL, CH2CH2} = k_{RL27}^+ [CH_2CH^*][H^*] \quad \text{Eq. S17}$$

$$r_{RL, HCCH} = k_{RL26}^+ [CH_3CH^*][*] \quad \text{Eq. S18}$$

$$r_{RL, H2O} = k_{RL12}^+ [O^*]^2 [H^*]^2 \quad \text{Eq. S19}$$

$$r_{RL, CO2} = k_{RL15}^+ [O^*][CO^*] \quad \text{Eq. S20}$$

At CO pre-saturation coverage,

$$r_{RH, CH4} = k_{RH16}^+ [CH_3^*][H^*][CO^*]^6 \quad \text{Eq. S21}$$

$$r_{RH, CH3CH2OH/CH3CHO} = k_{RH18}^+ [CH_3CO^*][H^*][CO^*]^5 \quad \text{Eq. S22}$$

$$r_{RH, CH2CH2} = k_{RH25}^+ [CH_2CH^*][H^*][CO^*]^5 \quad \text{Eq. S23}$$

$$r_{RH, HCCH} = k_{RH27}^+ [CH_2CH^*][*][CO^*]^5 \quad \text{Eq. S24}$$

$$r_{RH, H2O} = k_{RH10}^+ [O^*]^2 [H^*]^2 [CO^*]^5 \quad \text{Eq. S25}$$

$$r_{RH, CO2} = k_{RH13}^+ [O^*][CO^*]^6 \quad \text{Eq. S26}$$

Wherein,  $k_{RLn}^+$  or  $k_{RHn}^+$  is respectively the forward rate constant of reaction RLn or RHn. r is the rate of the corresponding elementary reaction.

Similar with the chain growth process, we analyzed the rate of the formation of CH<sub>4</sub>, CH<sub>3</sub>CHO, CH<sub>3</sub>CH<sub>2</sub>OH, CH<sub>2</sub>CH<sub>2</sub>, HCCH, H<sub>2</sub>O, and CO<sub>2</sub> by assuming all the other steps except RDS are quasi-equilibrium. Then, equations S15-S26 can be expressed by the following:

At the lowest coverage (RL),

$$R_{RL, CH4} = (\kappa k_B T/h) \exp[-(\Delta G_{RL9}^\ddagger + \Delta G_{sum, before RL18})/RT] [CO(g)][H_2(g)]^3 [H_2O(g)]^{-1} [*]^2 \quad \text{Eq. S27}$$

$$R_{RL, CH3CH2OH/CH3CHO} = (\kappa k_B T/h) \exp[-(\Delta G_{RL6}^\ddagger + \Delta G_{sum, before RL6})/RT] [CO(g)]^2 [H_2(g)]^{2.5} [H_2O(g)]^{-1} [*]^2 \quad \text{Eq. S28}$$

$$R_{RL, CH2CH2} = (\kappa k_B T/h) \exp[-(\Delta G_{RL27}^\ddagger + \Delta G_{sum, before RL27})/RT] [CO(g)]^2 [H_2(g)]^4 [H_2O(g)]^{-2} [*]^3 \quad \text{Eq. S29}$$

$$R_{RL,HCCH} = (\kappa k_B T/h) \exp[-(\Delta G_{RL26}^\ddagger + \Delta G_{sum, before RL26})/RT] [CO(g)]^2 [H_2(g)]^4 [H_2O(g)]^{-2} [*]^3 \quad \text{Eq. S30}$$

$$R_{RL,H_2O} = (\kappa k_B T/h) \exp[-(\Delta G_{RL12}^\ddagger + \Delta G_{sum, before RL12})/RT] [O^*]^2 [H_2(g)] [*]^2 \quad \text{Eq. S31}$$

$$R_{RL,CO_2} = (\kappa k_B T/h) \exp[-(\Delta G_{RL15}^\ddagger + \Delta G_{sum, before RL15})/RT] [O^*] [CO(g)] [*] \quad \text{Eq. S32}$$

At CO pre-saturation coverage (RH),

$$R_{RH,CH_4} = (\kappa k_B T/h) \exp[-(\Delta G_{RH16}^\ddagger + \Delta G_{sum, before RH16})/RT] [CO(g)]^8 [H_2(g)]^2 [CO_2(g)]^{-1} [*]^8 \quad \text{Eq. S33}$$

$$R_{RH,CH_3CH_2OH/CH_3CHO} = (\kappa k_B T/h) \exp[-(\Delta G_{RH18}^\ddagger + \Delta G_{sum, before RH18})/RT] [CO(g)]^8 [H_2(g)]^2 [CO_2(g)]^{-1} [*]^8 \quad \text{Eq. S34}$$

$$R_{RH,CH_2CH_2} = (\kappa k_B T/h) \exp[-(\Delta G_{RH25}^\ddagger + \Delta G_{sum, before RH25})/RT] [CO(g)]^9 [H_2(g)]^2 [CO_2(g)]^{-2} [*]^8 \quad \text{Eq. S35}$$

$$R_{RH,HCCH} = (\kappa k_B T/h) \exp[-(\Delta G_{RH27}^\ddagger + \Delta G_{sum, before RH27})/RT] [CO(g)]^9 [H_2(g)]^{1.5} [CO_2(g)]^{-2} [*]^8 \quad \text{Eq. S36}$$

$$R_{RH,H_2O} = (\kappa k_B T/h) \exp[-(\Delta G_{RH10}^\ddagger + \Delta G_{sum, before RH10})/RT] [O^*]^2 [CO(g)]^5 [H_2(g)] [*]^9 \quad \text{Eq. S37}$$

$$R_{RH,CO_2} = (\kappa k_B T/h) \exp[-(\Delta G_{RH13}^\ddagger + \Delta G_{sum, before RH13})/RT] [O^*] [CO(g)]^6 [*]^7 \quad \text{Eq. S38}$$

The above discussion shows that the formation of CH<sub>4</sub>, CH<sub>3</sub>CHO, and CH<sub>3</sub>CH<sub>2</sub>OH is competitive with the first C-C bond formation, and the formation of CH<sub>2</sub>CH<sub>2</sub> and HCCH is competitive with the second C-C bond formation at both lowest coverage and CO pre-saturation coverage.

We analyzed ratio of the rate constant, the ratio of the concentration of surface species, and the ratio of the reaction rate on the basis of our simplified micro-kinetic models. We assumed that the number of the sites of each slab is 7 (the maximum number of adsorbed CO is 7CO), the number of free sites [\*] of each slab is 5 and 0, respectively, at the lowest coverage and CO pre-saturation coverage. At CO pre-saturation coverage, the site for H (0.5H<sub>2</sub>) adsorption is not favorable thermodynamically and the probability of H adsorption is rather low under the proposed reaction conditions (423 K, 30 atm, and  $p_{H_2}/p_{CO}/p_{CH_4}/p_{CO_2}/p_{H_2O} = 10/5/2/2/1$ ).

For the removal of surface oxygen, only one surface oxygen is used in one slab. At the lowest coverage for one oxygen atom on the slab surface, stepwise addition of H atom has been used for the formation of H<sub>2</sub>O, and addition of one CO molecule has been used for the formation for CO<sub>2</sub>.

All concentrations of surface species (included surface free sites) are represented by the number per unit area (m<sup>2</sup>) and all concentrations of gaseous species are represented by the number per unit volume (m<sup>3</sup>). The results are shown in Table S5.

**Table S5.** A comparison between the reaction rate of chain growth and the reaction rate of products (CH<sub>3</sub>CHO, CH<sub>3</sub>CH<sub>2</sub>OH, CH<sub>2</sub>CH<sub>2</sub>, and HCCH) on the basis of simplified micro-kinetics model.

| products                                               | Ratio of rate constant | Ratio of concentrations                                                                             | Ratio of reaction rate |
|--------------------------------------------------------|------------------------|-----------------------------------------------------------------------------------------------------|------------------------|
| At the lowest coverage                                 |                        |                                                                                                     |                        |
| [CH <sub>4</sub> ]/[C <sub>2</sub> ]                   | 9.03×10 <sup>-5</sup>  | 1.33×10 <sup>5</sup> ([H <sub>2</sub> (g)] <sup>0.5</sup> [CO(g)] <sup>-1</sup> [*] <sup>-1</sup> ) | 12.01                  |
| [CH <sub>3</sub> CHO]/[C <sub>2</sub> ]                | 3.93                   | 1.14×10 <sup>-18</sup> ([*] <sup>-1</sup> )                                                         | 4.48×10 <sup>-18</sup> |
| [CH <sub>3</sub> CH <sub>2</sub> OH]/[C <sub>2</sub> ] | 3.93                   | 1.14×10 <sup>-18</sup> ([*] <sup>-1</sup> )                                                         | 4.48×10 <sup>-18</sup> |

|                                                  |                    |                                                                                          |                        |
|--------------------------------------------------|--------------------|------------------------------------------------------------------------------------------|------------------------|
| $[\text{CH}_2\text{CH}_2]/[\text{C}_3]$          | 46.26              | $8.75 \times 10^{-40} ([\text{CO}(\text{g})]^{-1} [\text{H}_2(\text{g})]^{-0.5})$        | $4.05 \times 10^{-38}$ |
| $[\text{HCCH}]/[\text{C}_3]$                     | 181.96             | $8.75 \times 10^{-40} ([\text{CO}(\text{g})]^{-1} [\text{H}_2(\text{g})]^{-0.5})$        | $4.05 \times 10^{-38}$ |
| $[\text{H}_2\text{O}]/[\text{CO}_2]$             | $1.46 \times 10^4$ | $3.07 \times 10^{37} ([\text{O}^*][\text{H}_2(\text{g})][^*][\text{CO}(\text{g})]^{-1})$ | $4.47 \times 10^{41}$  |
| -----                                            |                    |                                                                                          |                        |
| CO pre-saturation coverage                       |                    |                                                                                          |                        |
| $[\text{CH}_4]/[\text{C}_2]$                     | 80.01              | $0 ([\text{H}_2(\text{g})]^{0.5} [^*])$                                                  | 0                      |
| $[\text{CH}_3\text{CHO}]/[\text{C}_2]$           | 0.44               | $0 ([\text{H}_2(\text{g})]^{0.5} [^*])$                                                  | 0                      |
| $[\text{CH}_3\text{CH}_2\text{OH}]/[\text{C}_2]$ | 0.44               | $0 ([\text{H}_2(\text{g})]^{0.5} [^*])$                                                  | 0                      |
| $[\text{CH}_2\text{CH}_2]/[\text{C}_3]$          | 0.03               | $0 ([^*])$                                                                               | 0                      |
| $[\text{HCCH}]/[\text{C}_3]$                     | $2.96 \times 10^5$ | $0 ([^*][\text{H}_2(\text{g})]^{-0.5})$                                                  | 0                      |
| $[\text{H}_2\text{O}]/[\text{CO}_2]$             | 105.22             | $0 ([\text{O}^*][\text{H}_2(\text{g})][^*]^2[\text{CO}(\text{g})]^{-1})$                 | 0                      |

At the lowest coverage, the ratio of the rate constant term of the formation  $\text{CH}_4$  and  $\text{C}_2$  chain initiator is  $9.03 \times 10^{-5}$  and the corresponding ratio of the concentration term is  $1.33 \times 10^5$ . As a result, the rate of the formation of methane is greater than that of the formation of  $\text{C}_2$  initiator (12.01 to 1). Next, the ratio of the formation of  $\text{CH}_3\text{CHO}$  and  $\text{CH}_3\text{CH}_2\text{OH}$  vs.  $\text{C}_2$  initiator is 3.93 to 1 on one hand, and on the other hand, the corresponding ratio of the concentration terms of surface species is  $1.14 \times 10^{-18}$ . Totally, the rate of the formation of  $\text{CH}_3\text{CHO}$  and  $\text{CH}_3\text{CH}_2\text{OH}$  is much smaller than that of the formation of  $\text{C}_2$  initiator ( $4.48 \times 10^{-18}$  to 1). The reason for such huge rate difference comes from that fact that there are sufficient free sites for the dissociation reaction of  $\text{RL}_9$ , which is the RDS of the formation of  $\text{C}_2$  initiator. Then, the rate of the formation of  $\text{CH}_2\text{CH}_2$  and  $\text{HCCH}$  is also much smaller than that of the formation of  $\text{C}_3$  initiator ( $4.05 \times 10^{-38}$  and  $4.05 \times 10^{-38}$  to 1), and this is because that the second C-C bond formation is more sensitive on the partial pressure of  $\text{CO}$  and  $\text{H}_2$ , as indicated by the ratio of the concentration term,  $[\text{CO}(\text{g})]^{-1} [\text{H}_2(\text{g})]^{-0.5}$ . Comparing all these ratios of the reaction rates, the formation of methane is more favored than that of the chain growth process at the lowest coverage.

At CO pre-saturation coverage, the ratio of the rate-constant of methane formation and the formation of  $\text{C}_2$  initiator is 80 to 1. On the basis of the ratio of the concentration term ( $[\text{H}_2(\text{g})]^{0.5} [^*]$ ), the formation of methane needs one free site to adsorb  $0.5 \text{H}_2(\text{g})$ . However, it is difficult to adsorb one H atom with adsorption-desorption equilibrium constant of  $2.34 \times 10^{-8}$  (as discussed in main text) and the probability of free sites on the surface is rather low (close to 0). Similar situations are found for the formation of  $\text{CH}_2\text{CH}_2$ ,  $\text{HCCH}$ ,  $\text{CH}_3\text{CHO}$ , and  $\text{CH}_3\text{CH}_2\text{OH}$ . Due to high requirements of H content, hydrogenation reaction is remarkably inhibited. Therefore, the chain growth process is more favored than the formation of  $\text{CH}_4$ ,  $\text{CH}_3\text{CHO}$ ,  $\text{CH}_3\text{CH}_2\text{OH}$ ,  $\text{CH}_2\text{CH}_2$ , and  $\text{HCCH}$ , and this is because that the chain growth process (CO-insertion mechanism for the formation of  $\text{C}_2$  and  $\text{C}_3$  initiator) needs less free sites at CO pre-saturation coverage.

The removal of surface oxygen as  $\text{H}_2\text{O}$  and  $\text{CO}_2$  is competitive at the lowest coverage and the CO pre-saturation coverage. At the lowest coverage, the ratio of the rate constant of the formation of  $\text{H}_2\text{O}$  and  $\text{CO}_2$  is  $1.46 \times 10^4$  to 1, and the formation of  $\text{H}_2\text{O}$  is more favored not only by the kinetic term but also by the concentration term. As a result, the rate of  $\text{H}_2\text{O}$  formation will be much greater than that of  $\text{CO}_2$  formation ( $4.47 \times 10^{41}$  to 1). At CO pre-saturation coverage,  $\text{CO}_2$  formation is much more favored than that of  $\text{H}_2\text{O}$  despite the more favored kinetic preference of  $\text{H}_2\text{O}$  formation, and this is because that  $\text{H}_2\text{O}$  formation is highly dependent on the availability of free sites for  $\text{H}_2$  adsorption, which are very limited at CO pre-saturation coverage, as indicated by the ratio of

concentration terms of H<sub>2</sub>O/CO<sub>2</sub> formation ( $[O^*][H_2(g)][^*]^2[CO(g)]^{-1}$ ). Consequently, surface oxygen should be removed as CO<sub>2</sub> rather than as H<sub>2</sub>O.

## References

- 1 P. Zhao, Y. R. He, D. B. Cao, X. D. Wen, H. W. Xiang, Y. W. Li, J. G. Wang and H. J. Jiao, *Phys. Chem. Chem. Phys.*, 2015, **17**, 19446-19456.
- 2 B. A. J. Lechner, X. F. Feng, P. J. Feibelman, J. I. Cerda and M. Salmeron, *J. Phys. Chem. B*, 2018, **122**, 649-656.
- 3 H. Pfnür, P. Feulner and D. Menzel, *J. Chem. Phys.*, 1983, **79**, 4613-4623.
- 4 P. Zhao, Y. R. He, D. B. Cao, H. W. Xiang, H. J. Jiao, Y. Yang, Y. W. Li and X. D. Wen, *J. Phys. Chem. C*, 2019, **123**, 6508-6515.
